# Supplementary material
Source: publisher figshare collection journal article supplement (https://frontiersin.figshare.com/ndownloader/files/25278023)
Supplement: Supplementary file 1 [file 25278023]

## Sheet: Sheet1
IdE	IdS	IdO	Date	Initial Reference	Observer	IdO-Observer	Longitude	Latitude	Elevation [m]	Strike-slip (SS) displacement [m]	Sense of displacement, LL : left-lateral; RL : right-lateral	Uncertainty SS (+) [m]	Uncertainty SS (-) [m]	Max SS [m]	Min SS [m]	Large-aperture offset (SS direction) [m]	Uncertainty Large-aperture offset (SS direction) [m]	Aperture width (SS direction) [m]	Fault-normal Component (FNS) - "heave" [m]	Sense of displacement, S : shortening; L : lengthening	Uncertainty FNS (+) [m]	Uncertainty FNS (-) [m]	Max FNS [m]	Min FNS [m]	Opening [m]	Vertical throw (VT) [m]	Uncertainty VT (+) [m]	Uncertainty VT (-) [m]	Max VT [m]	Min VT [m]	Scarp height [m]	Large-aperture offset (VT direction) [m]	Uncertainty Large-aperture offset (VT direction) [m]	Aperture Width (VT direction) [m]	Dip slip (DS) [m]	Unvertainty DS (+) [m]	Uncertainty DS (-) [m]	Upside	Net Slip (NS) [m]	Uncertainty NS (+) [m]	Uncertainty NS (-) [m]	Max NS [m]	Min NS [m]	Slip Vector Inclination or plunge [°]	Net slip direction [°]	Pitch or rake	Net Large-aperture offset	Strike (°)	Uncertainty Strike (+)
19710209		1		Bonilla et al. (1971)			-118.451	34.2933		0.08	LL
19710209		2		Bonilla et al. (1971)			-118.439	34.2981		1	LL								0.3	S
19710209		3		Bonilla et al. (1971)			-118.438	34.2983		1	LL								0.3	S
19710209		4		Bonilla et al. (1971)			-118.439	34.2985		1	LL								0.3	S
19710209		5		Bonilla et al. (1971), Kamb et al. (1971)			-118.438	34.2983		1	LL								0.36	S
19710209		6		Bonilla et al. (1971)			-118.439	34.2986		1	LL								0.3	S
19710209		7		Bonilla et al. (1971)			-118.438	34.2987		1	LL								0.3	S
19710209		8		Bonilla et al. (1971)			-118.437	34.2984		1	LL								0.3	S
19710209		9		Bonilla et al. (1971)			-118.438	34.2992		1	LL								0.3	S
19710209		10		Bonilla et al. (1971)			-118.438	34.2991		1	LL								0.3	S
19710209		11		Bonilla et al. (1971)			-118.437	34.2985		1	LL								0.3	S
19710209		12		Bonilla et al. (1971)			-118.424	34.3121		0.02	RL
19710209		13		Bonilla et al. (1971)			-118.424	34.3094		0.02	RL
19710209		14		Bonilla et al. (1971)			-118.428	34.3104		0.01	RL
19710209		15		Bonilla et al. (1971)			-118.421	34.3077		0.02	RL
19710209		16		Bonilla et al. (1971)			-118.42	34.3088		0.01	RL
19710209		17		Bonilla et al. (1971)			-118.418	34.3085		0.01	RL
19710209		18		Bonilla et al. (1971)			-118.417	34.3083		0.03	RL
19710209		19		Bonilla et al. (1971)			-118.416	34.3085		0.02	RL
19710209		20		Bonilla et al. (1971)			-118.417	34.3069		0.02	RL
19710209		21		Bonilla et al. (1971)			-118.415	34.3073		0.01	RL
19710209		22		Bonilla et al. (1971)			-118.415	34.307		0.01	RL
19710209		23		Bonilla et al. (1971)			-118.415	34.3067		0.01	RL
19710209		24		Bonilla et al. (1971)			-118.419	34.3051		0.02	RL
19710209		25		Bonilla et al. (1971)			-118.415	34.3047		0.04	RL
19710209		26		Bonilla et al. (1971)			-118.415	34.3036		0.02	RL
19710209		27		Bonilla et al. (1971)			-118.416	34.3029		0.05	RL
19710209		28		Bonilla et al. (1971)			-118.421	34.3034		0.02	RL
19710209		29		Bonilla et al. (1971)			-118.426	34.3002																		0.5
19710209		30		Bonilla et al. (1971)			-118.422	34.2997											0.8	S
19710209		31		Bonilla et al. (1971)			-118.422	34.3012		0.01	RL
19710209		32		Bonilla et al. (1971)			-118.42	34.301		0.01	RL
19710209		33		Bonilla et al. (1971)			-118.415	34.3006		0.12	LL
19710209		34		Bonilla et al. (1971)			-118.411	34.3005		1	LL
19710209		35		Bonilla et al. (1971)			-118.411	34.295											0.86	S
19710209		36		Bonilla et al. (1971)			-118.403	34.2964		0.23	LL															0.05
19710209		37		Bonilla et al. (1971)			-118.4	34.2964		0.8	LL															1
19710209		38		Bonilla et al. (1971)			-118.4	34.2936																		0.22
19710209		39		Bonilla et al. (1971)			-118.4	34.2928		0.02	RL
19710209		40		Bonilla et al. (1971)			-118.4	34.2927		0.02	RL
19710209		41		Bonilla et al. (1971)			-118.4	34.2924		0.02	RL
19710209		42		Bonilla et al. (1971)			-118.4	34.2921		0.02	RL
19710209		43		Bonilla et al. (1971)			-118.4	34.2918		0.03	RL
19710209		44		Bonilla et al. (1971)			-118.4	34.2917		0.03	RL
19710209		45		Bonilla et al. (1971)			-118.401	34.2915		0.04	RL
19710209		46		Bonilla et al. (1971)			-118.401	34.2913		0.04	RL
19710209		47		Bonilla et al. (1971)			-118.401	34.2912		0.04	RL
19710209		48		Bonilla et al. (1971)			-118.401	34.291		0.28	RL
19710209		49		Bonilla et al. (1971)			-118.401	34.2909		0.28	RL
19710209		50		Bonilla et al. (1971)			-118.401	34.2908		0.28	RL
19710209		51		Bonilla et al. (1971), Kamb et al. (1971)			-118.384	34.2904		0.58	LL															0.76
19710209		52		Bonilla et al. (1971)			-118.377	34.2913		0.25	LL
19710209		53		Bonilla et al. (1971)			-118.378	34.2852																		0.05
19710209		54		Bonilla et al. (1971)			-118.377	34.2835		0.1	LL															0.25
19710209		55		Bonilla et al. (1971)			-118.374	34.2863																		0.5
19710209		56		Bonilla et al. (1971)			-118.372	34.2861																		0.45
19710209		57		Bonilla et al. (1971), Kamb et al. (1971)			-118.37	34.2827		0.25	LL								0.64	S						0.6
19710209		58		Bonilla et al. (1971)			-118.346	34.2798																		0.9
19710209		59		Bonilla et al. (1971)			-118.341	34.2783																		0.3
19710209		60		Bonilla et al. (1971)			-118.308	34.2767																		0.4
19710209		61		Bonilla et al. (1971)			-118.314	34.2734		0.3	LL															0.5
19710209		62		Bonilla et al. (1971)			-118.319	34.2733																		0.9
19710209		63		Bonilla et al. (1971)			-118.324	34.2731																		0.6
19710209		64		Bonilla et al. (1971)			-118.327	34.2727																		1
19710209		65		Bonilla et al. (1971)			-118.328	34.2725																		0.3
19710209		66		Bonilla et al. (1971)			-118.33	34.2731																		0.05
19710209		67		Bonilla et al. (1971)			-118.331	34.2738																		0.35
19710209		68		Bonilla et al. (1971)			-118.367	34.2808																		0.05
19710209		69		Bonilla et al. (1971)			-118.385	34.2857											0.35	S						0.3
19710209		70		Bonilla et al. (1971)			-118.389	34.286																		0.2
19710209		71		Bonilla et al. (1971), Kamb et al. (1971)			-118.396	34.2876											0.25	S						1
19710209		72		Bonilla et al. (1971)			-118.403	34.2883											0.7	S						0.9
19710209		73		Bonilla et al. (1971), Kamb et al. (1971)			-118.411	34.289											1.07	S						0.9
19710209		74		Kamb et al. (1971)			-118.41	34.2937											0.49	S
19710209		75		Bonilla et al. (1971), Kamb et al. (1971)			-118.409	34.2947											1.07	S						0.5
19710209		76		Bonilla et al. (1971), Kamb et al. (1971)			-118.434	34.2994		1.9	LL
19710209		77		Bonilla et al. (1971), Kamb et al. (1971)			-118.432	34.3002		1.9	LL								0.55	S
19710209		78		Bonilla et al. (1971), Kamb et al. (1971)			-118.431	34.3004		1.9	LL								0.55	S
19710209		79		Bonilla et al. (1971), Kamb et al. (1971)			-118.431	34.3004		1.9	LL								0.55	S
19710209		80		Bonilla et al. (1971), Kamb et al. (1971)			-118.429	34.3004		1.9	LL								0.6	S
19710209		81		Bonilla et al. (1971), Kamb et al. (1971)			-118.428	34.3005		1.9	LL								0.6	S						0.76
19710209		82		Bonilla et al. (1971)			-118.419	34.3126		0.01	RL
19710209		83		Bonilla et al. (1971)			-118.417	34.3113		0.01	RL
19710209		84		Bonilla et al. (1971)			-118.429	34.3061		0.01	RL
19710209		85		Bonilla et al. (1971)			-118.428	34.3059		0.01	RL
19710209		86		Bonilla et al. (1971)			-118.426	34.3051		0.01	RL
19710209		87		Bonilla et al. (1971)			-118.423	34.3063		0.06	RL
19710209		88		Bonilla et al. (1971)			-118.423	34.3061		0.06	RL
19710209		89		Bonilla et al. (1971)			-118.423	34.3059		0.06	RL
19710209		90		Bonilla et al. (1971)			-118.423	34.3058		0.06	RL
19710209		91		Bonilla et al. (1971)			-118.423	34.3056		0.06	RL
19710209		92		Bonilla et al. (1971)			-118.422	34.3053		0.06	RL
19710209		93		Bonilla et al. (1971)			-118.407	34.3245																		0.1
19710209		94		Bonilla et al. (1971)			-118.407	34.3245																		0.18
19710209		95		Bonilla et al. (1971), Kamb et al. (1971)			-118.441	34.2982											0.08	S
19710209		96		Bonilla et al. (1971), Kamb et al. (1971)			-118.436	34.2989		1.27	RL								0.66	S
19710209		97		Bonilla et al. (1971), Kamb et al. (1971)			-118.434	34.2995											0.69	S
19710209		98		Bonilla et al. (1971), Kamb et al. (1971)			-118.433	34.3		1.07	RL								1.83	S
19710209		99		Bonilla et al. (1971), Kamb et al. (1971)			-118.432	34.3009		0.91	RL								0.84	S
19710209		100		Bonilla et al. (1971), Kamb et al. (1971)			-118.432	34.3019																		0.3
19710209		101		Bonilla et al. (1971), Kamb et al. (1971)			-118.429	34.301		1.68	LL
19710209		102		Bonilla et al. (1971), Kamb et al. (1971)			-118.427	34.3004		1.68	LL								0.46	S						0.76
19710209		103		Bonilla et al. (1971), Kamb et al. (1971)			-118.426	34.3004											1.07	S						0.76
19710209		104		Bonilla et al. (1971), Kamb et al. (1971)			-118.425	34.3003		0.91	LL															0.46
19710209		105		Bonilla et al. (1971), Kamb et al. (1971)			-118.424	34.3003		0.61	LL															0.46
19710209		106		Bonilla et al. (1971), Kamb et al. (1971)			-118.423	34.3004		0.3	LL															0.53
19710209		107		Bonilla et al. (1971), Kamb et al. (1971)			-118.423	34.3001		0.91	LL															0.53
19710209		108		Bonilla et al. (1971), Kamb et al. (1971)			-118.421	34.3004		0.76	LL								0.3	S						0.15
19710209		109		Bonilla et al. (1971), Kamb et al. (1971)			-118.414	34.3004											0.91	S						0.3
19710209		110		Bonilla et al. (1971), Kamb et al. (1971)			-118.412	34.3004											0.13	S
19710209		111		Bonilla et al. (1971), Kamb et al. (1971)			-118.411	34.3003											0.2	S						0.25
19710209		112		Bonilla et al. (1971), Kamb et al. (1971)			-118.409	34.2965											0.05	S
19710209		113		Kamb et al. (1971)			-118.408	34.2974											0.03	S
19710209		114		Kamb et al. (1971)			-118.408	34.2949											0.05	S						0.08
19710209		115		Kamb et al. (1971)			-118.412	34.2957											0.05	S
19710209		116		Kamb et al. (1971)			-118.412	34.2945											0.5	S						0.31
19710209		117		Kamb et al. (1971)			-118.412	34.2947											0.13	S
19710209		118		Kamb et al. (1971)			-118.411	34.2938											0.25	S
19710209		119		Kamb et al. (1971)			-118.411	34.2928											0.25	S
19710209		120		Kamb et al. (1971)			-118.41	34.2927											0.15	S
19710209		121		Bonilla et al. (1971), Kamb et al. (1971)			-118.41	34.2944											0.25	S
19710209		122		Kamb et al. (1971)			-118.416	34.2978																		0.3
19710209		123		Kamb et al. (1971)			-118.416	34.2973																		0.3
19710209		124		Kamb et al. (1971)			-118.416	34.296		0.46	LL
19710209		125		Kamb et al. (1971)			-118.415	34.2954		0.91	LL															0.61
19710209		126		Kamb et al. (1971)			-118.414	34.2951																		0.13
19710209		127		Kamb et al. (1971)			-118.414	34.2953																		0.2
19710209		128		Kamb et al. (1971)			-118.41	34.2887											0.76	S						0.76
19710209		129		Bonilla et al. (1971), Kamb et al. (1971)			-118.405	34.289																		0.51
19710209		130		Bonilla et al. (1971), Kamb et al. (1971)			-118.401	34.2886		0.63	LL															0.25
19710209		131		Bonilla et al. (1971), Kamb et al. (1971)			-118.399	34.2878																		0.76
19710209		132		Bonilla et al. (1971), Kamb et al. (1971)			-118.392	34.2868		0.76	LL															0.25
19710209		133		Bonilla et al. (1971), Kamb et al. (1971)			-118.382	34.2904											0.15	S
19710209		134		Bonilla et al. (1971), Kamb et al. (1971)			-118.386	34.2859											0.25	S
19710209		135		Kamb et al. (1971)			-118.376	34.2955		0.23	LL
19710209		136		Kamb et al. (1971)			-118.376	34.2895											0.15	S
19710209		137		Kamb et al. (1971)			-118.378	34.2862																		0.13
19710209		138		Kamb et al. (1971)			-118.37	34.2861		0.05	LL								0.51	S						0.3
19710209		139		Kamb et al. (1971)			-118.367	34.2858																		0.58
19710209		140		Kamb et al. (1971)			-118.373	34.2828											1.07	S
19710209		141		Kamb et al. (1971)			-118.364	34.2847																		0.1
19710209		142		Bonilla et al. (1971), Kamb et al. (1971)			-118.365	34.2805											0.2	S						0.08
19710209		143		Bonilla et al. (1971), Kamb et al. (1971)			-118.36	34.2785											0.25	S						0.13
19710209		144		Bonilla et al. (1971), Kamb et al. (1971)			-118.358	34.2786											0.08	S
19710209		145		Bonilla et al. (1971), Kamb et al. (1971)			-118.355	34.2779											0.2	S
19710209		146		Kamb et al. (1971)			-118.349	34.28											1.02	S						0.76
19710209		147		Bonilla et al. (1971), Kamb et al. (1971)			-118.341	34.2745											0.03	S
19710209		148		Bonilla et al. (1971), Kamb et al. (1971)			-118.338	34.2739											0.03	S
19801010		1		Philip and Meghraoui, 1983; Yielding et al., 1981			1.45616	36.1604																		0.3												SE
19801010		2		Philip and Meghraoui, 1983; Yielding et al., 1981			1.53833	36.2163																		0.3												SE						55	315
19801010		3		Yielding et al., 1981			1.47577	36.1765																		0.4												SE						45	105
19801010		4		Philip and Meghraoui, 1983			1.46239	36.1597																		0.5												SE
19801010		5		Philip and Meghraoui, 1983; Yielding et al., 1981			1.45186	36.1566																		0.6												SE
19801010		6		Philip and Meghraoui, 1983			1.53153	36.2085											0.6	L						0.7												SE
19801010		7		Philip and Meghraoui, 1983			1.45135	36.1548																		0.8												SE
19801010		8		Philip and Meghraoui, 1983			1.47624	36.1744											0.2	L						0.8												SE
19801010		9		Philip and Meghraoui, 1983, Yielding et al., 1981			1.4522	36.1534																		1												SE						65	285
19801010		10		Philip and Meghraoui, 1983			1.46786	36.1635																		1												SE
19801010		11		Philip and Meghraoui, 1983			1.51542	36.1926																		1												SE
19801010		12		Philip and Meghraoui, 1983			1.52881	36.2079											0.4	L						1												SE
19801010		13		Philip and Meghraoui, 1983 (Map and Fig. 36b)			1.53239	36.2169																		1												SE										0
19801010		14		Philip and Meghraoui, 1983			1.46731	36.1649											0.4	L						1.5												SE
19801010		15		Philip and Meghraoui, 1983			1.53278	36.2112											1.2	L
19801010		16		Philip and Meghraoui, 1983			1.38154	36.1164																		1
19801010		17		Philip and Meghraoui, 1983			1.39748	36.1176																		1
19801010		18		Philip and Meghraoui, 1983			1.41292	36.1206																		0.5
19801010		19		Philip and Meghraoui, 1983			1.41582	36.1228																		1.1
19801010		20		Philip and Meghraoui, 1983			1.44948	36.1452																		2
19801010		21		Philip and Meghraoui, 1983			1.48309	36.1696																		0.5
19801010		22		Philip and Meghraoui, 1983; Yielding et al., 1981			1.48735	36.1788		1.3
19801010		23		Philip and Meghraoui, 1983			1.48866	36.1791																		1.1
19801010		24		Philip and Meghraoui, 1983; Yielding et al., 1981			1.4944	36.1805		0.7																1.2
19801010		25		Philip and Meghraoui, 1983; Yielding et al., 1981			1.49944	36.182		1.2																5
19801010		26		Philip and Meghraoui, 1983			1.51555	36.186																		2
19801010		27		Philip and Meghraoui, 1983; Yielding et al., 1981			1.53133	36.2018		2.1																2.5
19801010		28		Philip and Meghraoui, 1983			1.5979	36.2591																		0.4
19801010		29		Philip and Meghraoui, 1983			1.61151	36.2625																		0.23
19801010		30		Philip and Meghraoui, 1983			1.60991	36.2751																		2
19801010		31		Philip and Meghraoui, 1983			1.62057	36.2818																		3
19801010		32		Philip and Meghraoui, 1983			1.62611	36.2832																		2.5
19801010		33		Philip and Meghraoui, 1983			1.64508	36.2865																		2.5
19801010		34		Philip and Meghraoui, 1983			1.64372	36.2885																		5
19801010		35		Philip and Meghraoui, 1983			1.57367	36.2494																		0.4
19801010		36		Philip and Meghraoui, 1983			1.56573	36.2419																		0.25
19801010		37		Philip and Meghraoui, 1983			1.56467	36.2397																		0.15
19801010		38		Philip and Meghraoui, 1983			1.52015	36.1933																		1.5
19801010		39		Yielding et al., 1981			1.52166	36.1919																		2
19801010		40		Yielding et al., 1981			1.40409	36.119																		1
19801010		41		Yielding et al., 1981			1.41829	36.1255																		0.3																			160
19801010		42		Yielding et al., 1981			1.44085	36.1375																		1.5
19801010		43		Yielding et al., 1981			1.45157	36.1463																		3
19801010		44		Yielding et al., 1981			1.45414	36.1566																		0.6																		70	145
19801010		45		Yielding et al., 1981			1.52025	36.1904																		5
19801010		46		Yielding et al., 1981			1.53634	36.2087																		3																			140
19801010		47		Yielding et al., 1981			1.53081	36.2125																		1																		60	140
19801010		48		Yielding et al., 1981			1.57146	36.2455																		0.8
19801010		49		Yielding et al., 1981			1.64649	36.2889																		1.2																		45	320
19801010		50		Yielding et al., 1981			1.64742	36.2905																		4																		48	210
19801010		51		Yielding et al., 1981			1.66192	36.294																		1.4																		40	210
19830611		1		Rymer et al., 1985		1	-120.453	36.2347		0.12	RL															0.2												E
19830611		2		Rymer et al., 1985		2	-120.453	36.2338																		0.15												E
19830611		3		Rymer et al., 1985		3	-120.453	36.2331																		0.25												E
19830611		4		Rymer et al., 1985		4	-120.453	36.2329																		0.15												E
19830611		5		Rymer et al., 1985		5	-120.453	36.2327																		0.32												E
19830611		6		Rymer et al., 1985		6	-120.453	36.2326																		0.35												E
19830611		7		Rymer et al., 1985		7	-120.453	36.2325																		0.37												E
19830611		8		Rymer et al., 1985		8	-120.453	36.2323																		0.46												E	0.65
19830611		9		Rymer et al., 1985		9	-120.453	36.2312																		0.12												E
19830611		10		Rymer et al., 1985		10	-120.453	36.2311																		0.4												E
19830611		11		Rymer et al., 1985		11	-120.453	36.2293		0.18	RL															0.05												E
19830611		12		Rymer et al., 1985		12	-120.453	36.2293		0.04	RL															0.05												E
19830611		13		Rymer et al., 1985		13	-120.453	36.229																		0.15												E
19830611		14		Rymer et al., 1985		14	-120.453	36.2289		0.15	RL															0.4												E
19830611		15		Rymer et al., 1985		15	-120.453	36.2288																		0.13												E
19830611		16		Rymer et al., 1985		16	-120.453	36.2282																		0.4												E
19830611		17		Rymer et al., 1985		17	-120.454	36.228																		0.35												E
19830611		18		Rymer et al., 1985		18	-120.453	36.2274																		0.5												E
19830611		19		Rymer et al., 1985		19	-120.454	36.2268																		0.13												E
19830611		20		Rymer et al., 1985		20	-120.453	36.2268		0.2	RL																											E
19830611		21		Rymer et al., 1985		21	-120.453	36.2267		0.17	RL															0.09												E
19830611		22		Rymer et al., 1985		22	-120.454	36.2264																		0.3												E
19830611		23		Rymer et al., 1985		23	-120.453	36.2262																		0.3												E
19830611		24		Rymer et al., 1985		24	-120.453	36.2261																		0.45												E
19830611		25		Rymer et al., 1985		25	-120.453	36.2258																		0.09												E
19830611		26		Rymer et al., 1985		26	-120.453	36.2249																		0.05												E
19830611		27		Rymer et al., 1985		27	-120.452	36.2241																		0.1												E
19830611		28		Rymer et al., 1985		28	-120.455	36.2189																		0.1												E	0.13
19830611		29		Rymer et al., 1985		29	-120.455	36.2185																		0.15												E
19830611		30		Rymer et al., 1985		30	-120.455	36.2169																		0.1												E
19830611		31		Rymer et al., 1985		31	-120.455	36.2165																		0.12												E
19830611		32		Rymer et al., 1985		32	-120.455	36.2164																		0.1												E
19830611		33		Rymer et al., 1985		33	-120.455	36.2147		0.01	RL															0.01												E
19830611		34		Rymer et al., 1985		34	-120.455	36.2138		0.01	RL															0.01												E
19830611		35		Rymer et al., 1985		35	-120.455	36.2132		0.02	RL															0.01												E
19830611		36		Rymer et al., 1985		36	-120.454	36.2096		0.06	RL																											E
19830611		37		Rymer et al., 1985		37	-120.454	36.2093		0.08	RL															0.07												E
19830611		38		Rymer et al., 1985		38	-120.454	36.2088		0.08	RL															0.06												E
19830611		39		Rymer et al., 1985		39	-120.453	36.2084		0.09	RL															0.03												E
19830611		40		Rymer et al., 1985		40	-120.453	36.2082		0.06	RL															0.07												E
19830611		41		Rymer et al., 1985		41	-120.453	36.2073		0.1	RL															0.05												E	0.12
19830611		42		Rymer et al., 1985		42	-120.453	36.207		0.02	RL															0.04												E
19830611		43		Rymer et al., 1985		43	-120.453	36.2068		0.01	RL															0.04												E
19830611		44		Rymer et al., 1985		44	-120.453	36.2066		0.02	RL															0.02												E
19830611		45		Rymer et al., 1985		45	-120.453	36.2058		0.01	RL															0.01												E
19830611		46		Rymer et al., 1985		50	-120.453	36.2325																		0.17
19830611		47		Rymer et al., 1985		51	-120.453	36.2322																		0.1
19830611		48		Rymer et al., 1985		52	-120.454	36.232																		0.07
19830611		49		Rymer et al., 1985		53	-120.454	36.2319																		0.01
19830611		50		Rymer et al., 1985		54	-120.454	36.2316																		0.04
19830611		51		Rymer et al., 1985		55	-120.454	36.2313											0.03	S
19830611		52		Rymer et al., 1985		56	-120.454	36.231																		0.11
19830611		53		Rymer et al., 1985		57	-120.454	36.2309																		0.06
19830611		55		Rymer et al., 1985		58	-120.455	36.2307																		0.02
19830611		56		Rymer et al., 1985		59	-120.455	36.2306																		0.04
19830611		57		Rymer et al., 1985		60	-120.455	36.2302																		0.01
19830611		58		Rymer et al., 1985		61	-120.455	36.2298																		0.01
19830611		59		Rymer et al., 1985		75	-120.453	36.2141		0.01	RL															0.01
19830611		60		Rymer et al., 1985		76	-120.453	36.2139																		0.02
19830611		61		Rymer et al., 1985		77	-120.452	36.2139											0.03	S						0.01
19830611		62		Rymer et al., 1985			-120.455	36.2203		0.2	RL																											E
19860330		1		Bowman & Barlow 1991		351	132.811	-26.2023																		0.2
19860330		2		Bowman & Barlow 1991, Machette et al., 1993		400	132.843	-26.2686																		0.01
19860330		3		Bowman & Barlow 1991, Machette et al., 1993		401	132.844	-26.2654																		0.03
19860330		4		Bowman & Barlow 1991, Machette et al., 1993		402	132.845	-26.2624																		0.04
19860330		5		Bowman & Barlow 1991		403	132.845	-26.2609																		0.15
19860330		6		Bowman & Barlow 1991		404	132.845	-26.2603																		0.2
19860330		7		Bowman & Barlow 1991		405	132.844	-26.2583																		0.05
19860330		8		Bowman & Barlow 1991		407	132.844	-26.2555																		0.04
19860330		9		Bowman & Barlow 1991		408	132.843	-26.2545																		0.03
19860330		10		Bowman & Barlow 1991		410	132.846	-26.249																		0.03
19860330		11		Bowman & Barlow 1991		411	132.847	-26.2468																		0.12
19860330		12		Bowman & Barlow 1991		412	132.847	-26.2446																		0.2
19860330		13		Bowman & Barlow 1991		413	132.848	-26.237																		0.35
19860330		14		Bowman & Barlow 1991		414	132.848	-26.235																		0.2
19860330		15		Bowman & Barlow 1991		415	132.848	-26.2333																		0.2
19860330		16		Bowman & Barlow 1991		416	132.847	-26.2294																		0.2
19860330		17		Bowman & Barlow 1991		417	132.847	-26.2243																		0.25
19860330		18		Bowman & Barlow 1991		418	132.847	-26.2213																		0.25
19860330		19		Bowman & Barlow 1991		419	132.848	-26.2189																		0.45
19860330		20		Bowman & Barlow 1991		420	132.848	-26.2166																		0.5
19860330		21		Bowman & Barlow 1991		421	132.849	-26.2151																		0.2
19860330		22		Bowman & Barlow 1991		422	132.85	-26.2115																		0.4
19860330		23		Bowman & Barlow 1991		423	132.849	-26.2104																		0.45
19860330		24		Bowman & Barlow 1991		424	132.849	-26.2082																		0.35
19860330		25		Bowman & Barlow 1991		425	132.849	-26.2062																		0.35
19860330		26		Bowman & Barlow 1991		426	132.849	-26.205																		0.3
19860330		27		Bowman & Barlow 1991		427	132.847	-26.2032																		0.4
19860330		28		Bowman & Barlow 1991		428	132.846	-26.2046																		0.7
19860330		29		Bowman & Barlow 1991		429	132.846	-26.2044																		0.5
19860330		30		Bowman & Barlow 1991		430	132.845	-26.2041																		0.5
19860330		31		Bowman & Barlow 1991		431	132.845	-26.2037																		0.5
19860330		32		Bowman & Barlow 1991		432	132.844	-26.2035																		0.7
19860330		33		Bowman & Barlow 1991		433	132.832	-26.1986																		0.2
19860330		34		Bowman & Barlow 1991		434	132.829	-26.1994																		0.2
19860330		35		Bowman & Barlow 1991		437	132.825	-26.2007																		0.3
19860330		36		Bowman & Barlow 1991		439	132.821	-26.2015																		0.15
19860330		37		Bowman & Barlow 1991		440	132.818	-26.2015																		0.25
19860330		38		Bowman & Barlow 1991		441	132.814	-26.2031																		0.2
19860330		39		Bowman & Barlow 1991		442	132.815	-26.2017																		0.2
19860330		40		Bowman & Barlow 1991		443	132.813	-26.202																		0.2
19860330		41		Bowman & Barlow 1991		444	132.813	-26.202																		0.1
19860330		42		Bowman & Barlow 1991		446	132.805	-26.2026																		0.3
19860330		43		Bowman & Barlow 1991		447	132.801	-26.2038																		0.15
19860330		44		Bowman & Barlow 1991		448	132.8	-26.2045																		0.1
19860330		45		Bowman & Barlow 1991		449	132.798	-26.2052																		0.1
19860330		46		Bowman & Barlow 1991		450	132.845	-26.2043																		0.4
19860330		47		Bowman & Barlow 1991		664	132.844	-26.2033																		0.6
19860330		48		Bowman & Barlow 1991		665	132.845	-26.2017																		0.2
19860330		49		Bowman & Barlow 1991		666	132.845	-26.2017																		0.5
19860330		50		Bowman & Barlow 1991		667	132.844	-26.2014																		0.7
19860330		51		Bowman & Barlow 1991		668	132.844	-26.2013																		0.9
19860330		52		Bowman & Barlow 1991		669	132.844	-26.2012																		0.8
19860330		53		Bowman & Barlow 1991		670	132.844	-26.2011																		0.5
19860330		54		Bowman & Barlow 1991		671	132.843	-26.2009																		0.5
19860330		55		Bowman & Barlow 1991		672	132.843	-26.2009																		0.3
19860330		56		Bowman & Barlow 1991		673	132.842	-26.2008																		0.3
19860330		57		Bowman & Barlow 1991		674	132.842	-26.2007																		0.3
19860330		58		Bowman & Barlow 1991		675	132.842	-26.2007																		0.5
19860330		59		Bowman & Barlow 1991		676	132.842	-26.2006																		0.2
19860330		60		Bowman & Barlow 1991		677	132.841	-26.2004																		0.4
19860330		61		Bowman & Barlow 1991		678	132.841	-26.2001																		0.35
19860330		62		Bowman & Barlow 1991		679	132.841	-26.1998																		0.35
19860330		63		Bowman & Barlow 1991		680	132.84	-26.1994																		0.3
19860330		64		Bowman & Barlow 1991		681	132.84	-26.1993																		0.35
19860330		65		Bowman & Barlow 1991		682	132.84	-26.199																		0.4
19860330		66		Bowman & Barlow 1991		684	132.839	-26.1987																		0.3
19860330		67		Bowman & Barlow 1991		685	132.838	-26.1988																		0.3
19860330		68		Bowman & Barlow 1991		686	132.838	-26.1986																		0.04
19860330		69		Bowman & Barlow 1991		688	132.838	-26.1988																		0.3
19860330		70		Bowman & Barlow 1991		689	132.837	-26.1985																		0.15
19860330		71		Bowman & Barlow 1991		690	132.836	-26.1984																		0.4
19860330		72		Bowman & Barlow 1991		691	132.836	-26.1984																		0.4
19860330		73		Bowman & Barlow 1991		692	132.836	-26.1983																		0.35
19860330		74		Bowman & Barlow 1991		693	132.834	-26.1982																		0.15
19880122		1		Crone et al., 1992			134.035	-19.819																		1.7
19880122		2		Crone et al., 1992			133.939	-19.8184																		1.1																						67
19880122		3		Crone et al., 1992			133.935	-19.8197																		0.8																						290
19880122		4		Crone et al., 1992			133.883	-19.7563																		0.4					0.8
19880122		5		Crone et al., 1992			133.884	-19.7566																		0.8
19880122		6		Crone et al., 1992			133.884	-19.7566																		0.6
19881207		1		Philip et al., 1992		a	44.177	40.8527		0.15	RL															0.4
19881207		2		Philip et al., 1992		b	44.1824	40.851		0.17	RL															0.2
19881207		3		Philip et al., 1992		c	44.1896	40.8479		0.05	RL								0.75	S						0.5
19881207		4		Philip et al., 1992		d	44.193	40.8442																		1
19881207		5		Philip et al., 1992		e	44.1955	40.8436		1.4	RL															1.4
19881207		6		Philip et al., 1992		f	44.1989	40.8406																		1.4
19881207		7		Philip et al., 1992		g	44.2038	40.8388																		0.7
19881207		8		Philip et al., 1992		h	44.2094	40.8366		0.3	RL															1.1
19881207		9		Philip et al., 1992		i	44.2132	40.8352		0.9	RL															1.6
19881207		10		Philip et al., 1992		j	44.2199	40.8333		0.4	RL															1.3
19881207		11		Philip et al., 1992		k	44.225	40.8338			RL															0.25
19881207		12		Philip et al., 1992		l	44.2307	40.8304		0.25	RL															0.8
19881207		13		Philip et al., 1992		m	44.2324	40.831		1	RL															1.35
19881207		14		Philip et al., 1992		n	44.2353	40.8312		0.6	RL															0.8
19881207		15		Philip et al., 1992		o	44.2421	40.8309		0.4	RL															1.6
19881207		16		Philip et al., 1992		p	44.2472	40.8292		1	RL
19881207		17		Philip et al., 1992		q	44.2517	40.8259		0.15	RL
19930929		1		Seeber et al., 1996			76.6206	18.0702		0.53	LL	0.1	0.1
19930929		2		Seeber et al., 1996			76.6209	18.0696		0.12	LL	0.01	0.01
19930929		3		Seeber et al., 1996			76.6197	18.0701																							0.6
19930929		4		Seeber et al., 1996			76.6199	18.0704											0.1	L
19930929		5		Seeber et al., 1996			76.6199	18.0702																							0.35
19930929		6		Seeber et al., 1996			76.6204	18.0701																							0.45
19930929		7		Seeber et al., 1996			76.6205	18.0702																							0.1
19930929		8		Seeber et al., 1996			76.6208	18.0703																							0.25
19930929		9		Seeber et al., 1996			76.6208	18.0703																							0.15
19930929		10		Seeber et al., 1996			76.6202	18.0702																							0.4
19930929		11		Seeber et al., 1996			76.6203	18.0701																							0.45
19930929		12		Seeber et al., 1996			76.6198	18.0708																							0.15
19990921		1		Lee et al., 2003		A1	120.844	24.2992		0.9	RL			1.1	0.7				2.05	S				1.9		5												E	5.45			5.5	5.4		126.5			240
19990921		2		Lee et al., 2003		A2	120.844	24.2989		0.95	RL			1.3	0.6				2.15	S				1.9		5												E	5.5			5.6	5.4		125			240
19990921		4		Lee et al., 2003		A3	120.833	24.2997		0.1	LL			0.2					1.05	S				1		0.8												E	1.35			1.4	1.3		290.5			14
19990921		6		Lee et al., 2003		A4	120.833	24.2992		1.1	RL			1.3	0.9				1.85	S				1.7		0.7												E	2.2			2.3	2.1		256.5			16
19990921		7		Lee et al., 2003		A5	120.833	24.2982		0.6	RL			0.8	0.4				1.75	S				1.6		5.5												E	5.85			5.9	5.8		274			22
19990921		8		Lee et al., 2003		A6	120.832	24.2974											1.6	S						1												E	1.9						314			60
19990921		9		Lee et al., 2003		A7	120.832	24.2971		0.05	LL			0.1					0.7	S				0.6		0.7												E	1.05			1.1	1		328.5			56
19990921		10		Lee et al., 2003		A8	120.831	24.2962		1.2	LL			1.4	1				2.45	S				2.2		0.7												E	2.85			3	2.7		338			43
19990921		11		Lee et al, 2003		A9	120.801	24.2838		0.35	RL			0.7					4.35	S				4.3		4												SE	4.5						326			60
19990921		12		Lee et al., 2003		A10	120.798	24.2722		0.2	LL			0.3	0.1				0.6	S				0.4		1													1.2			1.3	1.1		180			250
19990921		13		Lee et al., 2003		A11	120.795	24.2787		0.5	RL			0.8	0.2				3.1	S				2.8		3.4												S	4.65			4.8	4.5		301			45
19990921		14		Lee et al., 2003		A12	120.79	24.2788		0.35	LL			0.5	0.2				3.25	S				3.1		4.8												S	5.85			5.9	5.8		7.5			100
19990921		15		Lee et al., 2003		A13	120.789	24.279		1.4	LL			2	0.8				4.5	S				4.1		3.7												S	5.95			6.2	5.7		10			83
19990921		16		Lee et al., 2003		A14	120.785	24.2784		1.5	LL			1.6	1.4				2.6	S				2.5		3												S	3.95			4	3.9		12			70
19990921		17		Lee et al., 2003		A15	120.783	24.2779		0.7	LL			1.1	0.3				2.5	S				2		3.4												S	4.25			4.5	4		17			92
19990921		18		Lee et al., 2003		A16	120.779	24.2769		0.7	RL			0.8	0.6				1.2	S				1.1		1.4												S	2						10			70
19990921		19		Lee et al., 2003		A17	120.783	24.2863		1.65	RL			1.8	1.5				0.3	S						3.4												S	3.8			3.9	3.7		314			124
19990921		20		Lee et al., 2003		A18	120.771	24.2787		0.95	RL			1.1	0.8				1.8	S				1.6		3													3.65			3.7	3.6		155.5			275
19990921		21		Lee et al., 2003		A19	120.769	24.2841																		1.6													2						283
19990921		22		Lee et al., 2003		A20	120.769	24.2836		1.95	RL			2.5	1.4				6	S				5.6		9.8													11.65			11.8	11.5		342			90
19990921		23		Lee et al., 2003		A21	120.763	24.2815		2.3	LL			2.8	1.8				3.9	S				3.5		6												SE	7.5			7.9	7.1		8			68
19990921		24		Lee et al., 2003		A22	120.76	24.2796		1.4	LL			1.6	1.2				3.7	S				3.2		5.5												SE	6.8			7.1	6.5		315			24
19990921		25		Lee et al., 2003		A24	120.761	24.2776		0.45	RL			0.6	0.3				1.45	S				1.4		3.5													3.8						168.5			275
19990921		26		Lee et al., 2003		B1	120.757	24.2746		0.9	LL								1	S						3.3													3.6						168			36
19990921		27		Lee et al., 2003		B2	120.755	24.2738		1.2	LL			1.3	1.1				1.75	S				1.6		3												E	3.7			3.8	3.6		318.5			330
19990921		28		Lee et al., 2003		B3	120.753	24.2696																		4												E							330			30
19990921		29		Lee et al., 2003		B4	120.752	24.269		1.95	LL			2.1	1.8				1.9	S				1.7		2												E	3.3			3.4	3.2		356			42
19990921		30		Lee et al., 2003		C8	120.698	24.0229		0.4	LL			1	-0.2				3.45	S				3.4		3.5												E	4.9						276			0
19990921		31		Lee et al., 2003		C9	120.698	24.0226		0.65	LL			1.4	-0.1				4.2	S				4.1		3.5												E	5.5						279			0
19990921		32		Lee et al., 2003		C10	120.697	24.0208		0.55	LL			0.7	0.4				1.75	S				1.7		2.1												E	2.8						287.5			0
19990921		33		Lee et al., 2003		C11	120.697	24.0189		1.3	RL								2.25	S						1.5												E	3.06						299.5			13
19990921		34		Lee et al., 2003		C12	120.697	24.0184		0.3	LL			0.5	0.1				2.35	S				2.3		1.4												E	2.8						278			0
19990921		35		Lee et al., 2003		C13	120.697	24.0183		0.35	LL			0.5	0.2				1.95	S				1.9		1.4												E	2.4						275			355
19990921		36		Lee et al., 2003		C14	120.697	24.0171																		1.2												NE							270			350
19990921		37		Lee et al., 2003		C15	120.697	24.0133																		1.7												E							274			20
19990921		38		Lin, 2000			120.809	24.2766																		2												N
19990921		39		Lin, 2000			120.806	24.275																		1.6												N
19990921		40		Lin, 2000			120.804	24.2737																		1												S
19990921		41		Lin, 2000			120.789	24.2776																		0.2												N
19990921		42		Lin, 2000			120.794	24.2784																		3.5
19990921		43		Lin, 2000			120.788	24.279																		4
19990921		44		Lin, 2000			120.783	24.2778		5																3												S
19990921		45		Lin, 2000			120.776	24.2769		1.7	LL															4.5
19990921		46		Lin, 2000			120.778	24.2758																		0.8												N
19990921		47		Lin, 2000			120.783	24.2752																		0.5												S
19990921		48		Lin, 2000			120.771	24.2787																		1.7												N
19990921		49		Lin, 2000			120.765	24.2779																		7
19990921		50		Lin, 2000			120.783	24.2871		0.2	LL															1												S
19990921		51		Lin, 2000			120.771	24.2885																		1												S
19990921		52		Lin, 2000			120.771	24.2862		0.3	RL															0.7												SW
19990921		53		Lin, 2000			120.769	24.2832		2	LL															9.5												E
19990921		54		Lin, 2000			120.764	24.2824																		7												E
19990921		55		Lin, 2000			120.758	24.278		5	LL															5												E
19990921		56		Lin, 2000			120.753	24.2702																		4.5												E
19990921		57		Lin, 2000			120.751	24.2661																		6												E
19990921		58		Lin, 2000			120.747	24.2615																		7.5
19990921		59		Lin, 2000			120.745	24.2571																		4.2
19990921		60		Lin, 2000			120.745	24.2548																		4.3
19990921		61		Lin, 2000			120.749	24.2544																		1												W
19990921		62		Lin, 2000			120.737	24.1038																		3												E
19990921		63		Lin, 2000			120.736	24.0958																		3												E
19990921		64		Lin, 2000			120.735	24.087																		0.4												SE
19990921		65		Lin, 2000			120.733	24.0868																		2.5
19990921		66		Lin, 2000			120.73	24.0862		5	RL
19990921		67		Lin, 2000			120.725	24.0852																		2
19990921		68		Lin, 2000			120.722	24.0803		2	LL															3												E
19990921		69		Lin, 2000			120.726	24.0752																		1.5												S
19990921		70		Lin, 2000			120.72	24.0764																		1
19990921		71		Chen et al., 2000			120.784	24.2852																		2.5			3	2								S
19990921		72		Chen et al., 2000			120.783	24.2861																		1.5												S
19990921		73		Chen et al., 2000			120.781	24.2878																		5.5												S
19990921		74		Chen et al., 2000			120.781	24.2877																		1.5												NE
19990921		75		Chen et al., 2000			120.779	24.2878																		3
19990921		76		Chen et al., 2000			120.772	24.2885																		0.5												SE
19990921		77		Chen et al., 2000			120.769	24.2828																		1
19990921		78		Chen et al., 2000			120.769	24.2825																		5
19990921		79		Chen et al., 2000			120.768	24.2828																		1												W
19990921		80		Chen et al., 2000			120.768	24.2837																		2
19990921		81		Chen et al., 2000			120.766	24.2854																		1.5
19990921		82		Chen et al., 2000			120.765	24.2827																		4
19990921		83		Chen et al., 2000			120.76	24.2795																		4.5			5	4
19990921		84		Chen et al., 2000			120.761	24.2782																		0.3												SE
19990921		85		Chen et al., 2000			120.764	24.2781																		0.4												SE
19990921		86		Chen et al., 2000			120.764	24.2777																		3.5												N
19990921		87		Chen et al., 2000			120.768	24.2781																		0.5												N
19990921		88		Chen et al., 2000			120.77	24.2787																		4.5			5	4								N
19990921		89		Chen et al., 2000			120.776	24.275																		1												N
19990921		90		Chen et al., 2000			120.777	24.2769																		2.5			3	2								S
19990921		91		Chen et al., 2000			120.778	24.2769																		3.5												S
19990921		92		Huang et al., 2000			120.764	24.2782																		0.2
19990921		93		Huang et al., 2000			120.762	24.2812																		4.5
19990921		94		Huang et al., 2000		CLP01	120.761	24.2798																		5
19990921		95		Huang et al., 2000		CLP02	120.757	24.2765		5	LL															3.5
19990921		96		Huang et al., 2000		CLP03	120.755	24.2736																		4
19990921		97		Huang et al., 2000			120.756	24.2739																		3.5												W
19990921		98		Huang et al., 2000			120.756	24.2731																		2.5												W
19990921		99		Huang et al., 2000		CLP04	120.752	24.2684																		4												E
19990921		100		Huang et al., 2000			120.747	24.2605																		3												E
19990921		101		Huang et al., 2000			120.749	24.254																		0.9												W
19990921		102		Huang et al., 2000			120.745	24.2554																		4												E
19990921		103		Huang et al., 2000		CLP05	120.745	24.2547																		3												E
19990921		104		Huang et al., 2000			120.742	24.2497																		2.5												SE
19990921		105		Huang et al., 2000			120.734	24.2455																		3												E
19990921		106		Huang et al., 2000		CLP06	120.734	24.2447																		3												E
19990921		107		Huang et al., 2000			120.733	24.2386																		2												E
19990921		108		Huang et al., 2000		CLP07	120.734	24.2347		2.5	LL															0.9												E
19990921		109		Huang et al., 2000			120.734	24.2331																		1												E
19990921		110		Huang et al., 2000			120.735	24.2145																		1												E
19990921		111		Huang et al., 2000			120.732	24.2111																		0.5												E
19990921		112		Huang et al., 2000		CLP08	120.732	24.2069																		1												E
19990921		113		Huang et al., 2000			120.731	24.197																		4.5												E
19990921		114		Huang et al., 2000		CLP09	120.729	24.1962																		2.5												E
19990921		115		Huang et al., 2000			120.729	24.1913																		2												E
19990921		116		Huang et al., 2000		CLP11	120.734	24.1793																		2.5												E
19990921		117		Huang et al., 2000			120.733	24.1767																		1.5												E
19990921		118		Huang et al., 2000			120.734	24.1751																		1.4												E
19990921		119		Huang et al., 2000		CLP12	120.733	24.1752																		2												E
19990921		120		Huang et al., 2000		CLP13	120.734	24.1683																		1												E
19990921		121		Huang et al., 2000			120.736	24.1639																		0.5												E
19990921		122		Huang et al., 2000			120.737	24.1622																		0.1												E
19990921		123		Huang et al., 2000			120.741	24.1599																		0.9												E
19990921		124		Huang et al., 2000		CLP14	120.742	24.1592																		1.8												E
19990921		125		Huang et al., 2000			120.743	24.156																		2.2												E
19990921		126		Huang et al., 2000			120.739	24.1519																		0.5												E
19990921		127		Huang et al., 2000		CLP16	120.743	24.1424																		1.5												E
19990921		128		Huang et al., 2000		CLP17	120.74	24.1369		10	LL															6												E
19990921		129		Huang et al., 2000		CLP18	120.74	24.135																		2												E
19990921		131		Kelson et al., 2001			120.719	24.0755											0.63	S
19990921		132		Kelson et al., 2001		Fig 12 AA'	120.721	24.0772																		2.2												SE
19990921		133		Kelson et al., 2001		Fig 12 BB'	120.721	24.0771																		2.2												SE
19990921		134		Kelson et al., 2001		Fig 12 CC'	120.721	24.0767																		2.2												SE
19990921		135		Kelson et al., 2001		Fig 12 DD'	120.72	24.0765																		2.3
19990921		136		Kelson et al., 2001		Fig 12 EE'	120.72	24.0763																		2.2
19990921		137		Kelson et al., 2001			120.745	24.2551																		3.9												E
19990921		138		Kelson et al., 2001			120.746	24.2547																		0.2												NW
19990921		139		Kelson et al., 2001			120.746	24.2546																		0.2												E
19990921		140		Kelson et al., 2001			120.747	24.2545																		0.2												E
19990921		141		Kelson et al., 2001			120.747	24.2545																		0.2												E
19990921		142		Kelson et al., 2001			120.747	24.2544																		0.2												E
19990921		143		Kelson et al., 2001			120.748	24.2544																		0.2												E
19990921		144		Kelson et al., 2001			120.748	24.2544																		0.3												E
19990921		145		Kelson et al., 2001			120.749	24.2545																		1.5												W
19990921		146		Huang et al., 2008			120.733	24.2416		1	LL	0.2	0.2						1.7	S	0.3	0.3	0.3															E
19990921		147		Huang et al., 2008			120.735	24.2416		0.1	RL								0.07	S				0.05														E
19990921		148		Huang et al., 2008			120.735	24.2423		0.15	LL								0.14	L				0.12
19990921		149		Huang et al., 2008			120.737	24.2425											0.17	S				0.15														E
19990921		150		Huang et al., 2008			120.737	24.2425											0.24	S				0.19														E
19990921		151		Huang et al., 2008			120.738	24.243		0.23	LL								0.52	S				0.44														E
19990921		152		Angelier et al., 2003			120.697	24.0187											0.17	S	0.02	0.02	0.02
19990921		154		Angelier et al., 2003			120.697	24.0187		0.32	LL	0.03	0.03	0.32	0.29				2.84	S	0.4	0.4	0.4			1.62												E	3.27						84			4
19990921		155		Angelier et al., 2003			120.697	24.0188		0.35	LL	0.03	0.03
19990921		156		Kelson et al., 2003		Fig 6 AA'	120.699	24.0425																		3
19990921		157		Kelson et al., 2003		Fig 6 BB'	120.698	24.0426																		0.8												E
19990921		158		Kelson et al., 2003		Fig 6 BB'	120.699	24.0426																		0.7												E
19990921		159		Kelson et al., 2003		Fig 6 BB'	120.699	24.0427																		0.9												E
19990921		160		Kelson et al., 2003		Fig 6 CC'	120.698	24.0429																		1												E
19990921		161		Chen et al., 2000			120.769	24.2805																		0.5												E
19990921		162		Ota et al., 2007		E1	120.718	23.9993																		0.5												W
19990921		163		Ota et al., 2007		E2	120.717	23.9921																		0.6												W
19990921		164		Ota et al., 2007		E3	120.717	23.9898																		0.6												W
19990921		165		Ota et al., 2007		E4	120.713	23.9813																		0.7												W
19990921		166		Ota et al., 2007		E5	120.712	23.9767																		0.7												W
19990921		167		Ota et al., 2007		E6	120.713	23.9748																		1.5												W
19990921		168		Ota et al., 2007		E7	120.713	23.9745																		1.8												W
19990921		169		Ota et al., 2007		E8	120.713	23.9734																		0.5												W
19990921		170		Ota et al., 2007		W2	120.69	23.9903																		2.5												E
19990921		171		Ota et al., 2007		W3	120.69	23.9795																		2.5												E
19990921		172		Ota et al., 2007		W4	120.692	23.977																		2												E
19990921		173		Ota et al., 2007		W5	120.693	23.9754																		1.5												E
19990921		174		Ota et al., 2007		W6	120.692	23.9748																		1.5												E
19990921		175		Ota et al., 2007		W7	120.693	23.9725																		1												E
19990921		176		Ota et al., 2007		W3	120.689	23.979																		2.5												E
20051008		1		Kaneda et al., 2008		039	73.351	34.5482																		2.5	0.5	0.5										E
20051008		2		Kaneda et al., 2008		038	73.3505	34.5491																		2.65	0.55	0.55										E
20051008		3		Kaneda et al., 2008		030	73.3479	34.5534																		0.45	0.15	0.15										E
20051008		5		Kaneda et al., 2008		021	73.3516	34.5604																		0.75	0.15	0.15										NE
20051008		6		Kaneda et al., 2008		013	73.3443	34.5626																		1.95	0.15	0.15										E
20051008		7		Kaneda et al., 2008		003	73.3413	34.5731																		1.6	0.3	0.3										E
20051008		8		Kaneda et al., 2008		045	73.353	34.5474																		1.45	0.15	0.15										N
20051008		9		Kaneda et al., 2008		060	73.3653	34.5262																		1.7	0.5	0.5										E
20051008		10		Kaneda et al., 2008		068	73.3668	34.5255																		5.7	0.7	0.07										E
20051008		11		Kaneda et al., 2008		080	73.3732	34.4867																		7.05	0.35	0.35										E
20051008		12		Kaneda et al., 2008		086	73.3893	34.4491																		0.85	0.15	0.15										E
20051008		13		Kaneda et al., 2008		094	73.4059	34.4262																		2.15	0.15	0.15										E
20051008		14		Kaneda et al., 2008		100	73.4095	34.4231																		2.4	0.3	0.3										E
20051008		15		Kaneda et al., 2008		110	73.4161	34.4175																		1.9	0.1	0.1										E
20051008		16		Kaneda et al., 2008		117	73.4522	34.3902																		2.45	0.25	0.25										N
20051008		17		Kaneda et al., 2008			73.4576	34.3913																		2												E
20051008		18		Kaneda et al., 2008		130	73.4703	34.395																		2.15	0.25	0.25										N
20051008		19		Kaneda et al., 2008		136	73.4738	34.3958																		2.2	0.2	0.2										N
20051008		20		Kaneda et al., 2008		137	73.474	34.3958		0.6	LL								4.6																			N
20051008		21		Kaneda et al., 2008		157	73.5115	34.3557																		0.85	0.05	0.05										E
20051008		22		Kaneda et al., 2008		162	73.5157	34.3525																		4.6	1.1	1.1										E
20051008		23		Kaneda et al., 2008		169	73.5181	34.3469																		2.05	0.25	0.25										E
20051008		24		Kaneda et al., 2008		183	73.5294	34.3366																		0.8	0.3	0.3										E
20051008		25		Kaneda et al., 2008		186	73.5306	34.3352																		0.65	0.05	0.05										E
20051008		26		Kaneda et al., 2008		188	73.5338	34.3343																		2.6	0.5	0.5										E
20051008		27		Kaneda et al., 2008		205	73.5358	34.3272																		1	0.1	0.1										E
20051008		28		Kaneda et al., 2008		209	73.5374	34.3258																		1.4	0.1	0.1										E
20051008		29		Kaneda et al., 2008		217	73.5391	34.324																		0.85	0.15	0.15										E
20051008		30		Kaneda et al., 2008		229	73.5404	34.3212																		0.8	0.5	0.5										E
20051008		31		Kaneda et al., 2008		248	73.5428	34.3193																		1.75	0.15	0.15										E
20051008		32		Kaneda et al., 2008		252	73.5435	34.3183																		2.95	0.45	0.45										E
20051008		33		Kaneda et al., 2008		258	73.5496	34.3113																		0.85	0.15	0.15										E
20051008		34		Kaneda et al., 2008		270	73.5593	34.2989																		3.7	0.5	0.5										E
20051008		35		Kaneda et al., 2008		286	73.5749	34.2834																		0.95	0.25	0.25										E
20051008		36		Kaneda et al., 2008		290	73.5759	34.2828																		0.5	0.3	0.3										E
20051008		37		Kaneda et al., 2008		302	73.5767	34.2812																		2.25	0.65	0.65										E
20051008		38		Kaneda et al., 2008		315	73.5812	34.2757																		1.05	0.15	0.15										N
20051008		39		Kaneda et al., 2008		331	73.5948	34.2638																		3.1	0.6	0.6										E
20051008		40		Kaneda et al., 2008		332	73.5949	34.263																		3.4	0.4	0.4										E
20051008		41		Kaneda et al., 2008		341	73.5969	34.256																		0.55	0.15	0.15										E
20051008		42		Kaneda et al., 2008		347	73.6004	34.2535																		0.2	0.1	0.1										E
20051008		43		Kaneda et al., 2008		355	73.6046	34.2492																		0.85	0.25	0.25										E
20051008		44		Kaneda et al., 2008		358	73.605	34.2479																		1	0.4	0.4										E
20051008		45		Kaneda et al., 2008		362	73.6104	34.245																		0.5	0.1	0.1										E
20051008		46		Kaneda et al., 2008		369	73.63	34.2239																		0.8	0.2	0.2										E
20051008		47		Kaneda et al., 2008		371	73.6373	34.2174																		1.75	0.25	0.25										E
20051008		48		Kaneda et al., 2008		375	73.639	34.2161																		1.05	0.25	0.25										E
20051008		49		Kaneda et al., 2008		384	73.6463	34.2105																		2.1	0.8	0.8										E
20051008		50		Kaneda et al., 2008		387	73.6493	34.2097																		3.65	0.55	0.55										E
20051008		51		Kaneda et al., 2008		388	73.6495	34.2095																		3.2	0.2	0.2										E
20051008		52		Kaneda et al., 2008		390	73.6504	34.2072																		1.25	0.15	0.15										E
20051008		53		Kaneda et al., 2008		399	73.6566	34.2002																		1.35	0.15	0.15										E
20051008		54		Kaneda et al., 2008		405	73.6577	34.1995																		1.7	0.3	0.3										E
20051008		55		Kaneda et al., 2008		411	73.6605	34.1981																		0.75	0.15	0.15										E
20051008		56		Kaneda et al., 2008		418	73.6634	34.1953																		1	0.1	0.1										E
20051008		57		Kaneda et al., 2008		424	73.6658	34.1928																		0.75	0.15	0.15										E
20051008		58		Kaneda et al., 2008		430	73.6663	34.1908																		0.55	0.25	0.25										E
20051008		59		Kaneda et al., 2008		437	73.6718	34.1882																		1.65	0.05	0.05										E
20051008		60		Kaneda et al., 2008		445	73.6748	34.1843																		0.25	0.15	0.15										NE
20051008		61		Kaneda et al., 2008		449	73.6757	34.1813																		0.65	0.15	0.15										E
20051008		62		Kaneda et al., 2008		450	73.6761	34.1808																		0.45	0.05	0.05										E
20051008		63		Kaneda et al., 2008		453	73.677	34.1799																		0.35	0.05	0.05										E
20051008		64		Kaneda et al., 2008		458	73.6782	34.1782																		1.75	0.25	0.25										E
20051008		65		Kaneda et al., 2008		461	73.6791	34.151		1.5	RL															1			1
20051008		66		Kaneda et al., 2008		56	73.357	34.5418																		1.7	0.1	0.1										E
20051008		67		Sayab & Khan, 2010		F1	73.6707	34.1892																		0.8												E										145
20051008		68		Sayab & Khan, 2010		F2	73.6706	34.1894																		0.7												E										147
20051008		69		Sayab & Khan, 2010		F3	73.6704	34.1897																		1												E										150
20051008		70		Sayab & Khan, 2010		F4	73.6708	34.19																		0.7												E										140
20051008		71		Sayab & Khan, 2010		F5	73.6705	34.19																		2	0.5	0.5	2.5	1.5								E										140
20051008		72		Sayab & Khan, 2010		F6	73.67	34.1905																		3.2												E										155
20051008		73		Sayab & Khan, 2010		F7	73.6697	34.1902																		0.8												E										135
20051008		74		Sayab & Khan, 2010		F8	73.6694	34.191																		3.3												E										145
20051008		75		Sayab & Khan, 2010		F9	73.6695	34.1911																		0.5												E										129
20051008		76		Sayab & Khan, 2010		F10	73.6688	34.1913																		0.2												W										310
20051008		77		Sayab & Khan, 2010		F11	73.6685	34.1911																		0.2												W										335
20051008		78		Sayab & Khan, 2010		F12	73.6685	34.191																		0.2												E										165
20051008		79		Sayab & Khan, 2010		F13	73.6692	34.1925																		0.6												E										150
20051008		80		Sayab & Khan, 2010		F14	73.6689	34.1931																		0.5												E										153
20051008		81		Sayab & Khan, 2010		F15	73.6777	34.1827																		0.5												E										144
20051008		82		Sayab & Khan, 2010		F16	73.6775	34.1826																		0.5												W										345
20051008		83		Sayab & Khan, 2010		F17	73.6771	34.1832																		0.7												E										220
20051008		84		Sayab & Khan, 2010		F18	73.677	34.1831																		0.5												E										218
20051008		85		Sayab & Khan, 2010			73.6699	34.1906											2.5	L						3.3												E
20080512	Beichuan fault (BF)	1	28/06	Liu-Zeng et al., 2009		NA	103.453	30.9942	923																	0.3	0.2	0.2										NW
20080512	Beichuan fault (BF)	2	17/06	Liu-Zeng et al., 2009; Xu et al., 2009		241; 3-4, 124	103.486	31.063	892																	1.8	0.4	0.4	2.17	1.5								NW
20080512	Beichuan fault (BF)	3	17/06	Liu-Zeng et al., 2009; Xu et al., 2009; Yu et al., 2010; Zhou et al., 2010; Zhang et al., 2012		239, 5-6, 123; 13; S13; 5-6	103.49	31.0653	881	0.66	RL							44								2.6	3.5	1.8	6.1	0.8								NW										70
20080512	Beichuan fault (BF)	4	16/06	Liu-Zeng et al., 2009; Xu et al., 2009; Zhang et al., 2012		231; 7; 7-8	103.565	31.083	1019									26								1.52	0.3	0.3	1.7	1.3
20080512	Beichuan fault (BF), Shenxi Gou	5	18/06	Liu-Zeng et al., 2009; Xu et al., 2009		618009; 8	103.597	31.0732	1246	1	RL															2.98	0.73	1.3	3.63	1.7								NW
20080512	Beichuan fault (BF), Shenxi Gou	6	18/06	Liu-Zeng et al., 2009		618008	103.599	31.076	1226																	4.95	1	1										NW
20080512	Beichuan fault (BF), Shenxi Gou	7	18/06	Liu-Zeng et al., 2009		618007	103.604	31.0794	1204																	2.8	0.56	0.56										NW
20080512	Beichuan fault (BF), Shenxi Gou	8	18/06	Liu-Zeng et al., 2009; Xu et al., 2009; Wang et al., 2010; Zhang et al., 2012		618003; 113-114; ; 10	103.612	31.086	1075	2.8	RL	1.2	1.2	4	1.6			30	3.4	S						2.25	0.75	0.75	3	1.5	2.6							NW
20080512	Beichuan fault (BF), Shenxi Gou	9	18/06	Liu-Zeng et al., 2009; Liu-Zeng et al., 2010; Zhang et al., 2012		618005; 9	103.61	31.0839	1113									25								2.12	0.5	0.5	2.4	1.6								NW
20080512	Beichuan fault (BF), Shenxi Gou	11	18/06	Liu-Zeng et al., 2009		245 & 953	103.616	31.0915																		3.1	0.5	0.5
20080512	Beichuan fault (BF), Shenxi Gou	12	18/06	Liu-Zeng et al., 2009; Xu et al., 2009; Zhou et al., 2010		628002	103.622	31.1014	1003									18								5.6	0.6	0.6	6.2	5								NW										60
20080512	Beichuan fault (BF), Shenxi Gou	13	19/06	Liu-Zeng et al., 2009		262	103.627	31.1019	1054																	2.45	0.5	0.5										NW
20080512	Beichuan fault (BF), Shenxi Gou	14	19/06	Liu-Zeng et al., 2009		263	103.627	31.1017	1048																	1.9	0.3	0.3										NW
20080512	Beichuan fault (BF), Shenxi Gou	15	19/06	Liu-Zeng et al., 2009; Liu-Zeng et al., 2010		260	103.629	31.103	1050																	1.48	0.3	0.3	1.5	1.46								NW
20080512	Beichuan fault (BF), Shenxi Gou	16	19/06	Liu-Zeng et al., 2009		264	103.629	31.1042	1057																	1.04	0.2	0.2										NW
20080512	Beichuan fault (BF), Miaoba, Hongkou	17	19/06	Liu-Zeng et al., 2009		619002	103.635	31.1085	973																	0.36												NW
20080512	Beichuan fault (BF), Miaoba, Hongkou	18	19/06	Liu-Zeng et al., 2009		267	103.637	31.1094	999																	0.35	0.05	0.05										NW
20080512	Beichuan fault (BF), Miaoba, Hongkou	19	19/06	Liu-Zeng et al., 2009		619005	103.639	31.1106	988																	0.8	0.12	0.12										NW
20080512	Beichuan fault (BF), Miaoba, Hongkou	20	19/06	Liu-Zeng et al., 2009		619006	103.644	31.1133	995																	0.95	0.1	0.1										NW
20080512	Beichuan fault (BF), Miaoba, Hongkou	21	19/06	Liu-Zeng et al., 2009		619008	103.646	31.115	995																	0.6	0.09	0.09										NW
20080512	Beichuan fault (BF), Miaoba, Hongkou	22	19/06	Liu-Zeng et al., 2009		619010	103.653	31.1172	964																	0.93	0.15	0.15										NW
20080512	Beichuan fault (BF), Miaoba, Hongkou	23	19/06	Liu-Zeng et al., 2009; Xu et al., 2009; Liu-Zeng et al., 2010		963, 619011; 14-15, 121	103.655	31.1193	960	2.55	RL	0.25	0.25	2.8	2.3											1.9	0.6	0.4	2.5	1.5								NW
20080512	Beichuan fault (BF), Miaoba, Hongkou	26	19/06	Liu-Zeng et al., 2009; Liu-Zeng et al., 2010		271	103.661	31.1212	974																	4.42	0.45	0.45	4.42	4.4
20080512	Beichuan fault (BF), Miaoba, Hongkou	27	13/06	Liu-Zeng et al., 2009		201	103.663	31.1217	971																	4.6	0.2	0.2										NW
20080512	Beichuan fault (BF), Miaoba, Hongkou	28		Liu-Zeng et al., 2009		201-b	103.665	31.1225																		3.3	0.4	0.4
20080512	Beichuan fault (BF), Miaoba, Hongkou	29	17/06	Liu-Zeng et al., 2009; Liu-Zeng et al., 2010; Zhang et al., 2012		617022; 12	103.664	31.1222	953									80								3.7	0.54	0.54	3.8	3.6								NW
20080512	Beichuan fault (BF), Miaoba, Hongkou	30	17/06	Liu-Zeng et al., 2009; Liu-Zeng et al., 2009; Liu-Zeng et al., 2010		617012	103.665	31.1255	1024																	0.71	0.11	0.11	0.71	0.7								SE
20080512	Beichuan fault (BF), Miaoba, Hongkou	31	17/06	Liu-Zeng et al., 2009; Liu-Zeng et al., 2010		617011	103.665	31.1257	1025																	0.59	0.1	0.1	0.6	0.57								SE
20080512	Beichuan fault (BF), Miaoba, Hongkou	32	17/06	Liu-Zeng et al., 2009; Liu-Zeng et al., 2010		617010	103.665	31.1265	1072																	0.7	0.1	0.1										SE
20080512	Beichuan fault (BF), Miaoba, Hongkou	33	17/06	Liu-Zeng et al., 2009		617009	103.666	31.1266	1070																	0.28	0.05	0.05										SE
20080512	Beichuan fault (BF), Gaoyan Village, Hongkou	34	13/06	Liu-Zeng et al., 2009, Liu-Zeng et al., 2010		187	103.669	31.1243	1009																	1.59	0.24	0.24	1.6	1.59								SE
20080512	Beichuan fault (BF), Gaoyan Village, Hongkou	35	13/06	Liu-Zeng et al., 2009		186	103.67	31.1248	1013																	1.35	0.2	0.2										SE
20080512	Beichuan fault (BF), Gaoyan Village, Hongkou	36	13/06	Liu-Zeng et al., 2009		185	103.67	31.1251	1013																	1.6	0.24	0.24										SE
20080512	Beichuan fault (BF), Gaoyan Village, Hongkou	39	13/06	Liu-Zeng et al., 2009; Xu et al., 2009		182, 184; 18	103.671	31.1253	1027	0.75	RL															2.1	0.4	0.5	2.6	1.74								SE
20080512	Beichuan fault (BF), Gaoyan Village, Hongkou	40	13/06	Liu-Zeng et al., 2009		181	103.671	31.1256	1038																	2.65	0.5	0.5										SE
20080512	Beichuan fault (BF), Gaoyan Village, Hongkou	41	17/06	Liu-Zeng et al., 2009		617005	103.669	31.1278	1058																	0.45	0.07	0.07
20080512	Beichuan fault (BF), Gaoyan Village, Hongkou	42	17/06	Liu-Zeng et al., 2009		617004	103.669	31.1282	1069																	0.43	0.06	0.06
20080512	Beichuan fault (BF), Gaoyan Village, Hongkou	43	17/06	Liu-Zeng et al., 2009		617002	103.67	31.129	1077																	0.6	0.1	0.1
20080512	Beichuan fault (BF), Gaoyan Village, Hongkou	44	17/06	Liu-Zeng et al., 2009		617001	103.67	31.1294	1077	2.1	RL	0.2	0.2													0.63	0.1	0.1
20080512	Beichuan fault (BF), Gaoyan Village, Hongkou	45	13/06	Liu-Zeng et al., 2009; Zhang et al., 2012		190; 13	103.674	31.1278	1039									42								1.73	0.55	0.55	2.26	1.2
20080512	Beichuan fault (BF), Gaoyan Village, Hongkou	47	13/06	Liu-Zeng et al., 2009		188-189, 977	103.675	31.1286	1049																	2.3	0.4	0.5	2.7	1.83								SE
20080512	Beichuan fault (BF), Gaoyan Village, Hongkou	48	17/06	Liu-Zeng et al., 2009		617015	103.673	31.1315	1084	2.3	RL	0.3	0.3													0.45	0.1	0.1
20080512	Beichuan fault (BF), Gaoyan Village, Hongkou	51	29/09	Liu-Zeng et al., 2009		979-981	103.677	31.1292	1021																	2.1	0.2	0.2	2.4	1.7								SE
20080512	Beichuan fault (BF), Gaoyan Village, Hongkou	53	29/09	Liu-Zeng et al., 2009; Zhang et al., 2012		985; 4-5	103.677	31.1305	1001									20.6								2.9	1	1.8	3.9	1.1								SE
20080512	Beichuan fault (BF), Gaoyan Village, Hongkou	54	18/06	Liu-Zeng et al., 2009		254	103.675	31.1335	1068	0.25	RL	0.05	0.05													0.04												SE
20080512	Beichuan fault (BF), Gaoyan Village, Hongkou	55	18/06	Liu-Zeng et al., 2009		249	103.676	31.1346	1063	0.25	RL	0.05	0.05																									SE
20080512	Beichuan fault (BF), Gaoyan Village, Hongkou	56	29/09	Liu-Zeng et al., 2009		986	103.679	31.1319	995																	0.45	0.1	0.1										SE
20080512	Beichuan fault (BF), Gaoyan Village, Hongkou	57	17/06	Liu-Zeng et al., 2009		617020	103.677	31.1353	1062	1.7	RL	0.34	0.34													0.36	0.05	0.05										SE
20080512	Beichuan fault (BF), Gaoyan Village, Hongkou	58	29/09	Liu-Zeng et al., 2009		969	103.679	31.136	1005																	0.35	0.1	0.1										SE
20080512	Beichuan fault (BF), Gaoyan Village, Hongkou	59	23/06	Liu-Zeng et al., 2009		971	103.679	31.136	999																	0.17												SE
20080512	Beichuan fault (BF), Gaoyan Village, Hongkou	60	23/06	Liu-Zeng et al., 2009		970	103.679	31.1362	1000																	0.17												SE
20080512	Beichuan fault (BF), Gaoyan Village, Hongkou	61	28/09	Liu-Zeng et al., 2009; Xu et al., 2009; Zhang et al., 2012		192, 192-b, 962; 19-20; 6-7, 14	103.692	31.1453	1079	3	RL	1	1					29.6								4.83	0.9	0.9	5.7	4																77		32
20080512	Beichuan fault (BF), Donglin Shi	64	30/09	Liu-Zeng et al., 2009; Xu et al., 2009; Zhang et al., 2012; Zhou et al., 2010		993; 21-25; 22-23; S11	103.818	31.2855	1255	1.7	RL	0.8	0.9	2.5	0.8			27								2.1	2.9	1.3	5	0.8
20080512	Beichuan fault (BF), Donglin Shi	65	22/07	Liu-Zeng et al., 2009; Zhang et al., 2012		618-619; 24	103.945	31.4083	1341									40								1.75	0.6	0.6	2.3	1.2
20080512	Beichuan fault (BF), Qingping-Gaochuan	67	04/10	Liu-Zeng et al., 2009; Xu et al., 2009; Wang et al., 2010; Zhang et al., 2012		591-592, 1071-1072; 29, 32-35; ; 25-27	104.11	31.57	926	1.1	RL	0.5	0.5	1.5	0.55			28.6	2.3	S	0.5	0.5	0.5	1.8		3.4	0.55	1.2	3.8	2.2
20080512	Beichuan fault (BF), Qingping-Gaochuan	70	16/07	Liu-Zeng et al., 2009		579	104.146	31.6135																		1.45
20080512	Beichuan fault (BF), Qingping-Gaochuan	71	17/07	Liu-Zeng et al., 2009		595	104.153	31.613																		0.68
20080512	Beichuan fault (BF), Qingping-Gaochuan	72	17/07	Liu-Zeng et al., 2009		596	104.153	31.6182	1149																	1.68	0.25	0.25
20080512	Beichuan fault (BF), Qingping-Gaochuan	73	17/07	Liu-Zeng et al., 2009		597	104.153	31.6185	1132																	2.8	0.42	0.42
20080512	Beichuan fault (BF), Qingping-Gaochuan	74	06/10	Liu-Zeng et al., 2009		1088	104.153	31.6185	1122																	2.4
20080512	Beichuan fault (BF), Qingping-Gaochuan	75	06/10	Liu-Zeng et al., 2009		1087	104.153	31.6193	1131	0.95	RL															1.4
20080512	Beichuan fault (BF), Qingping-Gaochuan	76	12/11	Liu-Zeng et al., 2009		11-16	104.165	31.6249	1016																	3	0.5	0.5
20080512	Beichuan fault (BF), Qingping-Gaochuan	78	06/10	Liu-Zeng et al., 2009; Zhang et al., 2012		11-17, 1089; 27	104.17	31.6278	1015																	4.3	1	1	4.6	4
20080512	Beichuan fault (BF), Qingping-Gaochuan	80	06/10	Liu-Zeng et al., 2009; Xu et al., 2009; Zhang et al., 2012		1086; 41; 28	104.175	31.6295	1004	1.9	RL	0.4	0.4													3	0.5	0.5	3.27	2.8
20080512	Beichuan fault (BF), Qingping-Gaochuan	82	16/07	Liu-Zeng et al., 2009; Xu et al., 2009; Zhou et al., 2010; Zhang et al., 2010		576-578, 1083, 1085; 42-43; S9; B112	104.176	31.6298		1.4	RL	0.3	0.4	1.65	1.02			59								1.75	0.5	0.5	2.21	1.32
20080512	Beichuan fault (BF), Qingping-Gaochuan	85	12/11	Liu-Zeng et al., 2009		11-26, 1081	104.189	31.6359																		1.55	0.3	0.3	1.81	1.3
20080512	Beichuan fault (BF), Leigu	87	27/06	Liu-Zeng et al., 2009; Xu et al., 2009; Wang et al., 2010; Zhang et al., 2012		454, 456; 50, 52-53, 55, 58, 60-61, 67, 69, 72; ;29-32	104.42	31.78	749	2.05	RL	0.35	0.35													3.4	1.8	1.3	5.2	2.1
20080512	Beichuan fault (BF), Leigu	89	26/06	Liu-Zeng et al., 2009; Xu et al., 2009		442-444; 57, 62-66, 68, 71, 73-75	104.42	31.7809	728																	2.9	0.6	0.6	3.4	2.3
20080512	Beichuan fault (BF), Leigu	92	26/06	Liu-Zeng et al., 2009; Xu et al., 2009; Yu et al., 2010		445; 76-77; 101, 104	104.421	31.7813	725																	2.8	0.6	0.9	3.4	1.9
20080512	Beichuan fault (BF), Leigu	93	24/06	Liu-Zeng et al., 2009		372	104.421	31.7816	725																	3.2	0.4	0.4
20080512	Beichuan fault (BF), Leigu	94	26/06	Liu-Zeng et al., 2009		403	104.424	31.7784	723																	3	0.5	0.5
20080512	Beichuan fault (BF), Leigu	95	26/06	Liu-Zeng et al., 2009; Xu et al., 2009		387, 398; 91, 132	104.428	31.7994	886	2.24	RL	0.1	0.1	2.28	2.2											3	0.8	0.8	3.8	2.3
20080512	Beichuan fault (BF), Leigu	97	26/06	Liu-Zeng et al., 2009; Xu et al., 2009		386	104.432	31.8064	923	6.3	RL	0.5	0.5													4.6	0.9	0.6	5.5	3.9
20080512	Beichuan fault (BF), Beichuan-Huangjiaba	98	25/06	Liu-Zeng et al., 2009; Xu et al., 2009		378; 101, 112	104.457	31.8292	642	2.3	RL	0.2	0.2	2.4	2.14											3.15	0.66	0.66	3.3	3.05
20080512	Beichuan fault (BF), Beichuan-Huangjiaba	101	12/11	Liu-Zeng et al., 2009; Xu et al., 2009, Yu et al., 2009; Zhang et al., 2010, Zhang et al., 2012		11-5 - 11-7; 103; 145-146; B118; 36	104.468	31.8377	708	3.5	RL	1	1.3	4.5	2.2			100								8.2	2	2	10.8	6.5
20080512	Beichuan fault (BF), Beichuan-Huangjiaba	102	12/11	Liu-Zeng et al., 2009; Yu et al., 2010		11-9	104.475	31.8434	697																	4.9	0.5	0.5	5.3	4.5
20080512	Beichuan fault (BF), Beichuan-Huangjiaba	103	12/11	Liu-Zeng et al., 2009; Yu et al., 2010		11-11	104.475	31.844	699	2.4	RL															2.5	0.5	0.5	3	2
20080512	Beichuan fault (BF), Beichuan-Huangjiaba	104	25/06	Liu-Zeng et al., 2009; Xu et al., 2009; Zhang et al., 2012		380-382, 11-13; 111; 39	104.503	31.8606	631									70								4.7	0.65	0.65	5.3	4.1
20080512	Beichuan fault (BF), Beichuan-Huangjiaba	108	12/11	Liu-Zeng et al., 2009; Zhang et al., 2012		11-14; 40	104.525	31.871	619									30								2.5	0.5	0.5	2.6	2.4
20080512	Beichuan fault (BF), Beichuan-Huangjiaba	109	21/06	Liu-Zeng et al., 2009; Xu et al., 2009; Yu et al., 2010; Zhang et al., 2012		626001; 134-136; 170-171, 175; 41	104.534	31.8747		1.34	RL	0.1	0.1	1.4	1.2			38								3.3	0.6	0.6	3.9	2.7
20080512	Beichuan fault (BF), Chenjiaba-Xujiaba	110	21/06	Liu-Zeng et al., 2009; Xu et al., 2009		621005; 137, 139, 140	104.58	31.9241	652	2.75	RL	0.7	0.6	3.45	2.2											2.6	0.7	0.6	3.25	2
20080512	Beichuan fault (BF), Chenjiaba-Xujiaba	111	22/06	Liu-Zeng et al., 2009; Xu et al., 2009; Yu et al., 2010; Zhang et al., 2012		352; 143-145; 186-187; 44	104.622	31.9956	770	2.15	RL	0.35	0.45	2.4	1.7			50								2.4	0.4	0.4	2.8	2.07
20080512	Beichuan fault (BF), Chenjiaba-Xujiaba	112	22/06	Liu-Zeng et al., 2009; Xu et al., 2009; Yu et al., 2010		351; 146; 194-196	104.623	31.9963	772	2.5	RL	0.2	0.2	2.7	2.35											2.4	0.5	0.5	2.85	1.88
20080512	Beichuan fault (BF), Pintong	113	21/06	Liu-Zeng et al., 2009; Zhang et al., 2012		621004; 47	104.685	32.0605	694																	2.55	0.5	0.5	2.6	2.5
20080512	Beichuan fault (BF), Pintong	114	21/06	Liu-Zeng et al., 2009; Xu et al., 2009; Yu et al., 2010		621002	104.688	32.0622	681	2.2	RL	0.7	0.3	2.9	1.9											2.3	0.5	0.5	2.75	1.7
20080512	Beichuan fault (BF), Pintong	116	21/06	Liu-Zeng et al., 2009; Yu et al., 2010		621003; 222-223	104.69	32.0645	700																	1.8	0.7	0.7	2.4	1.1
20080512	Beichuan fault (BF), Nanba - Wenjiaba	117	22/06	Liu-Zeng et al., 2009; Zhang et al., 2010		360	104.824	32.1901	685																	0.57	0.13	0.13	0.63	0.5
20080512	Beichuan fault (BF), Nanba - Wenjiaba	118	22/06	Liu-Zeng et al., 2009; Zhang et al., 2012		357-359;50	104.825	32.191	687	1.13	RL	0.1	0.1	1.2	1.06			30								0.8	0.25	0.25	1.04	0.58
20080512	Beichuan fault (BF), Nanba - Wenjiaba	122	22/06	Liu-Zeng et al., 2009		355-356	104.826	32.1917	680									14.6								1.09	0.2	0.2	1.12	1.06																		73
20080512	Beichuan fault (BF), Nanba - Wenjiaba	123	21/06	Liu-Zeng et al., 2009; Yu et al., 2010		342, 342-b; 226	104.839	32.2026	688	1.8	RL															1.5	0.2	0.2	1.6	1.4
20080512	Beichuan fault (BF), Nanba - Wenjiaba	125	21/06	Liu-Zeng et al., 2009; Xu et al., 2009		302; 169	104.84	32.2037	689	2.5	RL															1.43	0.1	0.1	1.5	1.35
20080512	Beichuan fault (BF), Nanba - Wenjiaba	126	21/06	Liu-Zeng et al., 2009; Xu et al., 2009		303; 172-174	104.844	32.2064	708	2.4	RL															1.1	0.1	0.2	1.2	0.9
20080512	Beichuan fault (BF), Nanba - Wenjiaba	127	21/06	Liu-Zeng et al., 2009		326	104.849	32.2102	707	1.08	RL	0.3	0.3													0.83	0.1	0.1
20080512	Beichuan fault (BF), Nanba - Wenjiaba	128	21/06	Liu-Zeng et al., 2009; Xu et al., 2009		325; 176	104.849	32.2102	706	1.17	RL	0.4	0.4	1.4	0.7											1.05	0.2	0.2	1.15	0.85
20080512	Beichuan fault (BF), Nanba - Wenjiaba	130	21/06	Liu-Zeng et al., 2009		324	104.849	32.2103	706	0.97	RL	0.2	0.2	1.2	0.74											0.85	0.2	0.2	0.95	0.75
20080512	Beichuan fault (BF), Nanba - Wenjiaba	132	21/06	Liu-Zeng et al., 2009		323	104.85	32.2104	705	1.45	RL	0.4	0.4	1.6	1.3											0.87	0.2	0.2	0.9	0.83
20080512	Beichuan fault (BF), Nanba - Wenjiaba	134	21/06	Liu-Zeng et al., 2009		322	104.85	32.2107	705																	0.9	0.09	0.09
20080512	Beichuan fault (BF), Nanba - Wenjiaba	135	21/06	Liu-Zeng et al., 2009		307	104.85	32.2107	700																	0.77	0.08	0.08
20080512	Beichuan fault (BF), Nanba - Wenjiaba	136	21/06	Liu-Zeng et al., 2009		308	104.85	32.2109	699																	1.06	0.11	0.11
20080512	Beichuan fault (BF), Nanba - Wenjiaba	137	21/06	Liu-Zeng et al., 2009		310	104.85	32.2111	703																	1.18	0.12	0.12
20080512	Beichuan fault (BF), Nanba - Wenjiaba	138	21/06	Liu-Zeng et al., 2009		311	104.85	32.2112	703																	1.04	0.1	0.1
20080512	Beichuan fault (BF), Nanba - Wenjiaba	139	21/06	Liu-Zeng et al., 2009		312	104.851	32.2112	704																	1.05	0.1	0.1
20080512	Beichuan fault (BF), Nanba - Wenjiaba	140	21/06	Liu-Zeng et al., 2009		313-314	104.851	32.2115	705																	0.95	0.1	0.1	0.99	0.91
20080512	Beichuan fault (BF), Nanba - Wenjiaba	142	21/06	Liu-Zeng et al., 2009		315	104.851	32.2116	705																	0.69	0.07	0.07
20080512	Beichuan fault (BF), Nanba - Wenjiaba	143	21/06	Liu-Zeng et al., 2009		316	104.851	32.2116	705																	0.8	0.08	0.08
20080512	Beichuan fault (BF), Nanba - Wenjiaba	144	21/06	Liu-Zeng et al., 2009		317-318	104.851	32.2117	704																	0.85	0.1	0.1	0.9	0.8
20080512	Beichuan fault (BF), Nanba - Wenjiaba	146	21/06	Liu-Zeng et al., 2009		319	104.851	32.2118	706																	1.12	0.11	0.11
20080512	Beichuan fault (BF), Nanba - Wenjiaba	147	21/06	Liu-Zeng et al., 2009		320	104.852	32.2119	706																	1.1	0.11	0.11
20080512	Beichuan fault (BF), Nanba - Wenjiaba	148	21/06	Liu-Zeng et al., 2009		321	104.852	32.2119	706																	0.9	0.09	0.09
20080512	Beichuan fault (BF), Nanba - Wenjiaba	150	21/06	Liu-Zeng et al., 2009		328	104.855	32.2141	717	2.29	RL	0.4	0.4	2.7	1.88											1.16	0.11	0.11	1.2	1.12																		55
20080512	Beichuan fault (BF), Nanba - Wenjiaba	151	21/06	Liu-Zeng et al., 2009		330	104.856	32.2151	718																	1.23	0.12	0.12
20080512	Beichuan fault (BF), Nanba - Wenjiaba	152	21/06	Liu-Zeng et al., 2009		332	104.857	32.2152	719	2.8	RL	0.4	0.4													1.32	0.13	0.13
20080512	Beichuan fault (BF), Nanba - Wenjiaba	153	21/06	Liu-Zeng et al., 2009		333	104.857	32.2156	720																	1.27	0.19	0.19
20080512	Beichuan fault (BF), Nanba - Wenjiaba	154	21/06	Liu-Zeng et al., 2009; Yu et al., 2010		335, 339; 235-236	104.86	32.2185	738	1.2	RL															1.2	0.4	0.5	1.57	0.7
20080512	Beichuan fault (BF), Shikan - Guangzhuang	157	23/06	Liu-Zeng et al., 2009		361	105.146	32.3902	678	0.22	RL															0.32	0.05	0.05
20080512	Pengguan fault (PF)	158	16/06	Liu-Zeng et al., 2009		1037	103.706	31.0991																		0.2
20080512	Pengguan fault (PF)	159	11/06	Liu-Zeng et al., 2009		161-164	103.749	31.1239	802																	1.63	0.3	0.3	1.9	1.47
20080512	Pengguan fault (PF)	163	12/06	Liu-Zeng et al., 2009; Xu et al., 2009; Liu-Zeng et al., 2012		167; 25; 167	103.792	31.1608	898																	0.68	0.35	0.2	1	0.5
20080512	Pengguan fault (PF)	166	12/06	Liu-Zeng et al., 2009; Liu-Zeng et al., 2012		170	103.793	31.1617	899									10								0.51	0.25	0.25	0.76	0.23
20080512	Pengguan fault (PF)	167	12/06	Liu-Zeng et al., 2009; Xu et al., 2009; Liu-Zeng et al., 2012		173; 23; 172-173	103.792	31.1625	902	0.5	LL															0.42	0.1	0.1	0.49	0.37																		358
20080512	Pengguan fault (PF)	168	11/06	Liu-Zeng et al., 2009; Xu et al., 2009		160; 1	103.853	31.1655	880																	0.7	0.4	0.4	1.1	0.35
20080512	Pengguan fault (PF)	169	11/06	Liu-Zeng et al., 2009; Xu et al., 2009		158; 5	103.863	31.173	926																	2.38	0.25	0.25	2.45	2.3
20080512	Pengguan fault (PF)	176	10/06	Liu-Zeng et al., 2009		146	103.89	31.1932	1206																	1.7	0.14	0.14
20080512	Pengguan fault (PF)	177	10/06	Liu-Zeng et al., 2009		149	103.893	31.1975	1101																	2.4	0.5	0.5
20080512	Pengguan fault (PF)	178	09/06	Liu-Zeng et al., 2009; Xu et al., 2009		145; 9-10	103.902	31.2039	959																	2.28	0.6	0.8	2.75	1.4
20080512	Pengguan fault (PF)	179	30/05	Liu-Zeng et al., 2009; Xu et al., 2009		34, 34-b, 34-c; 11-12	103.913	31.2118	937																	1.87	0.4	0.4	2.1	1.5																		30
20080512	Pengguan fault (PF)	182	30/05	Liu-Zeng et al., 2009; Xu et al., 2009		33	103.914	31.213	931	0.98				1	0.96											2.3	0.34	0.34	2.4	2.26
20080512	Pengguan fault (PF)	183	30/05	Liu-Zeng et al., 2009		31	103.915	31.2134	929																	2.5	0.38	0.38
20080512	Pengguan fault (PF)	184	30/05	Liu-Zeng et al., 2009; Xu et al., 2009; Zhou et al., 2010		30; 15-16; S16	103.915	31.2139	933	1.3	RL	0.7	0.7	2	0.6			18								2.5	0.4	0.4	2.7	2																		55
20080512	Pengguan fault (PF)	185	09/06	Liu-Zeng et al., 2009; Xu et al., 2009		143; 17	103.92	31.2175	1074																	1	0.1	0.1
20080512	Pengguan fault (PF)	186	09/06	Liu-Zeng et al., 2009; Xu et al., 2009		142; 18	103.931	31.2238	1216																	0.73	0.3	0.3	1	0.45
20080512	Pengguan fault (PF)	187	05/06	Liu-Zeng et al., 2009; Xu et al., 2009		124; 19	103.933	31.2248	1315																	1.34	0.1	0.1	1.38	1.3
20080512	Pengguan fault (PF)	188	05/06	Liu-Zeng et al., 2009		118	103.937	31.2307	1109																	1.34	0.2	0.2
20080512	Pengguan fault (PF)	189	05/06	Liu-Zeng et al., 2009		127	103.943	31.2377	1048																	1.4	0.1	0.1
20080512	Pengguan fault (PF)	190	05/06	Liu-Zeng et al., 2009		128	103.947	31.2429	1021																	1.75	0.1	0.1
20080512	Pengguan fault (PF)	191	05/06	Liu-Zeng et al., 2009; Zhang et al., 2012		115; 47	103.953	31.2535	905									8								1.2	0.18	0.18
20080512	Pengguan fault (PF)	192	05/06	Liu-Zeng et al., 2009		116	103.956	31.2568	971																	2.8	0.42	0.42
20080512	Pengguan fault (PF)	193	08/06	Liu-Zeng et al., 2009; Zhang et al., 2012		134; 21	103.966	31.2687	910									29.1								2.13	0.21	0.21	2.15	2.1
20080512	Pengguan fault (PF)	194	04/06	Liu-Zeng et al., 2009		113-b,c,d	104.002	31.3196	762																	2.19	0.5	0.2	2.66	2
20080512	Pengguan fault (PF)	198	04/06	Liu-Zeng et al., 2009; Xu et al., 2009		92, 111; 24	104.044	31.3452	802	0.18	RL															1.11	0.17	0.17	1.16	1.06
20080512	Pengguan fault (PF)	200	03/06	Liu-Zeng et al., 2009; Xu et al., 2009; Zhang et al., 2012		84 - 84-e; 25; 22	104.046	31.3454	806									5.5								1.03	0.17	0.17	1.11	0.9
20080512	Pengguan fault (PF)	207	03/06	Liu-Zeng et al., 2009		76 - 77-b	104.078	31.3622	841																	0.72	0.11	0.11	1.5	0.72
20080512	Pengguan fault (PF)	210	03/06	Liu-Zeng et al., 2009		73-75	104.079	31.3624	837																	1.1	0.2	0.3	1.28	0.8
20080512	Pengguan fault (PF)	212	02/06	Liu-Zeng et al., 2009; Xu et al., 2009		54	104.118	31.3979	747	2.85	LL	0.1	0.1	2.9	2.8											1.8	0.4	0.4	2.1	1.1
20080512	Pengguan fault (PF)	214	08/10	Liu-Zeng et al., 2009; Xu et al., 2009; Wang et al., 2010; Zhang et al., 2012		1094-1096; 27-28; ; 23	104.118	31.3997	753	2	LL							5	1.4	S						2.55	1	1.3	3.5	1.3																		45
20080512	Pengguan fault (PF)	216	02/06	Liu-Zeng et al., 2009; Xu et al., 2009		53; 32	104.128	31.4129	857																	2	0.5	0.5
20080512	Pengguan fault (PF)	217	01/06	Liu-Zeng et al., 2009; Xu et al., 2009; Zhang et al., 2012		38; 35-36; 48	104.162	31.46	692	0.54	RL	0.1	0.1	0.55	0.52			10								1.15	0.12	0.12	1.34	0.55
20080512	Pengguan fault (PF)	218	01/06	Liu-Zeng et al., 2009; Xu et al., 2009; Zhang et al., 2012; Zhou et al., 2010		39; 37-39; 24: S15	104.165	31.4612	693	0.47	RL							14								1.15	1	1	2.1	0.75																		50
20080512	Pengguan fault (PF)	219	02/10	Liu-Zeng et al., 2009		1048	104.203	31.4779	711																	0.65	0.5	0.5
20080512	Pengguan fault (PF)	220	02/10	Liu-Zeng et al., 2009; Xu et al., 2009; Wang et al., 2010		1046; 40-41;	104.203	31.4782	722										0.6	S						0.77	0.4	0.5	1.1	0.3	0.9
20080512	Xiaoyudong fault (XF)	221	30/09	Liu-Zeng et al., 2009; Zhang et al., 2012		1023; 20	103.74	31.2126	1147																	2.5	0.9	0.9	3.4	1.7								SW
20080512	Xiaoyudong fault (XF)	222	30/09	Liu-Zeng et al., 2009, Zhang et al., 2010; Liu-Zeng et al., 2012		1026	103.74	31.211	1154	0.45	LL	0.2	0.2	0.5	0.4											0.63	0.2	0.2	0.8	0.5																		355
20080512	Xiaoyudong fault (XF)	223		Liu-Zeng et al., 2009; Liu-Zeng et al., 2012; Xu et al., 2009; Zhang et al., 2012		28, 700, 994; 2-3; 19	103.75	31.1993	1002	1.5	LL	0.45	0.45	1.6	1.45			55								2.65	0.85	1.55	3.5	1.1								SW										332
20080512	Xiaoyudong fault (XF)	224	30/09	Liu-Zeng et al., 2009, Liu-Zeng et al., 2012; Xu et al., 2009		1009/27, 12; 8-9	103.754	31.1949	1005	1.4	LL	0.5	0.5	1.92	1											1.6	0.4	0.5	2	1.15																		320
20080512	Xiaoyudong fault (XF)	226	30/09	Liu-Zeng et al., 2009, Liu-Zeng et al., 2012		1015	103.751	31.1976	1014																	2.1	0.3	0.3
20080512	Xiaoyudong fault (XF)	227	30/09	Liu-Zeng et al., 2009, Liu-Zeng et al., 2012; Xu et al., 2009		1013; 26-26-b; 4-5	103.752	31.1968	1014	1.8	LL	1.7	0.9	3.5	0.93											1.75	0.7	0.7	2.4	1.1																		310	20
20080512	Xiaoyudong fault (XF)	230	28/05	Liu-Zeng et al., 2009, Liu-Zeng et al., 2012		11	103.755	31.1935	997																	0.5	0.1	0.1
20080512	Xiaoyudong fault (XF)	231	28/05	Liu-Zeng et al., 2009		10	103.756	31.1931	991																	0.6	0.05	0.05																				320
20080512	Xiaoyudong fault (XF)	232	28/05	Liu-Zeng et al., 2009; Xu et al., 2009; Liu-Zeng et al., 2012		8-b, 9; 14; 1002	103.757	31.1926	990	0.3	LL															0.55	0.2	0.2	0.75	0.4																		300
20080512	Xiaoyudong fault (XF)	234	28/05	Liu-Zeng et al., 2009; Xu et al., 2009; Zhang et al., 2012		7-8; 15; 16	103.757	31.1925	990	0.3	LL							30								1	0.3	0.6	1.34	0.4																		339
20080512	Xiaoyudong fault (XF)	236	28/05	Liu-Zeng et al., 2009; Liu-Zeng et al., 2012		6	103.758	31.1918	979	0.9	LL	0.5	0.5													1.2	0.17	0.17	1.3	1.1
20080512	Xiaoyudong fault (XF)	237	28/05	Liu-Zeng et al., 2009; Liu-Zeng et al., 2009; Liu-Zeng et al., 2012		14; 6	103.759	31.1914	981	0.9																1.25	0.21	0.21	1.4	1.1
20080512	Xiaoyudong fault (XF)	238	28/05	Liu-Zeng et al., 2009; Xu et al., 2009; Liu-Zeng et al., 2012; Zhang et al., 2012		13, 14-b; 18; ; 9-10	103.76	31.1907	980	1.2	RL							13								1.23	0.3	0.3	1.5	1																		345
20080512	Xiaoyudong fault (XF)	240	28/05	Liu-Zeng et al., 2009		14-c	103.76	31.1902	950	1.06	LL	0.2	0.2													1.08	0.16	0.16
20080512	Xiaoyudong fault (XF)	241	28/05	Liu-Zeng et al., 2009		14-d	103.76	31.1898	949	1.8	LL															0.69	0.1	0.1
20080512	Xiaoyudong fault (XF)	242	30/09	Liu-Zeng et al., 2009; Xu et al., 2009; Liu-Zeng et al., 2012		14-e,1028	103.762	31.1889	947	2.1	LL	0.9	0.7	3	1.5											1.3	0.25	0.25	1.42	1.2																		300
20080512	Xiaoyudong fault (XF)	245	30/09	Liu-Zeng et al., 2009, Liu-Zeng et al., 2012		14-g, 14h,701-702, 1027	103.762	31.1888	951	1.8	LL	1.4	0.4	3.2	1.4											1.07	0.3	0.3	1.3	0.71																		293
20080512	Xiaoyudong fault (XF)	249	28/05	Liu-Zeng et al., 2009; Xu et al., 2009		14-i	103.763	31.1883	945	1.3	LL															1.36	0.2	0.2	1.5	1.21
20080512	Xiaoyudong fault (XF)	250	28/05	Liu-Zeng et al., 2009		14-j	103.763	31.1883	951																	0.35	0.05	0.05
20080512	Xiaoyudong fault (XF)	251	29/05	Liu-Zeng et al., 2009, Liu-Zeng et al., 2012		18	103.765	31.1873	945	1.65	LL	0.65	0.65	2.9	2.3											1.05	0.16	0.16																				305
20080512	Xiaoyudong fault (XF)	252	29/05	Liu-Zeng et al., 2009, Liu-Zeng et al., 2012		17	103.765	31.1871	943																	1.53	0.23	0.23																				322
20080512	Xiaoyudong fault (XF)	253	29/05	Liu-Zeng et al., 2009, Liu-Zeng et al., 2012		19	103.767	31.1859	952	0.5	LL															0.64	0.04	0.04	0.68	0.6
20080512	Xiaoyudong fault (XF)	254	29/05	Liu-Zeng et al., 2009		16	103.767	31.1856	943	0.75	LL	0.25	0.25	0.75	0.35											1.06	0.16	0.16																				310
20080512	Xiaoyudong fault (XF)	255	29/05	Liu-Zeng et al., 2009, Liu-Zeng et al., 2012; Zhang et al., 2012		15	103.768	31.1854	941	0.6	LL	0.12	0.12					25								0.95	0.13	0.13	1	0.88																		310
20080512	Xiaoyudong fault (XF)	256	29/05	Liu-Zeng et al., 2009		20	103.768	31.185	942																	0.87	0.13	0.13
20080512	Xiaoyudong fault (XF)	257	29/05	Liu-Zeng et al., 2009		21	103.769	31.1847	942	1	LL	0.1	0.1													0.74	0.11	0.11																				312
20080512	Xiaoyudong fault (XF)	258	29/05	Liu-Zeng et al., 2009		22	103.77	31.1839	939	0.75	LL	0.15	0.15		0.6											0.65	0.1	0.1																				320
20080512	Xiaoyudong fault (XF)	259	16/06	Liu-Zeng et al., 2009		616025	103.775	31.1808	928																	0.61	0.1	0.1
20080512	Xiaoyudong fault (XF)	260	16/06	Liu-Zeng et al., 2009		616024	103.775	31.1806	924																	0.43	0.1	0.1
20080512	Xiaoyudong fault (XF)	264	16/06	Liu-Zeng et al., 2009		616020-616023	103.776	31.1795	927																	0.53	0.3	0.3	0.81	0.39
20080512	Xiaoyudong fault (XF)	265	01/10	Liu-Zeng et al., 2009		1031	103.776	31.1792	929	0.2	LL	0.1	0.1													0.47	0.1	0.1																				337
20080512	Xiaoyudong fault (XF)	266	16/06	Liu-Zeng et al., 2009		616019	103.776	31.1791	926																	0.61	0.1	0.1
20080512	Xiaoyudong fault (XF)	267	16/06	Liu-Zeng et al., 2009		616018	103.776	31.1788	924																	0.48	0.1	0.1
20080512	Xiaoyudong fault (XF)	268	16/06	Liu-Zeng et al., 2009		616017	103.778	31.178	923																	0.7	0.11	0.11
20080512	Xiaoyudong fault (XF)	269	16/06	Liu-Zeng et al., 2009		616016	103.779	31.1776	921																	0.52	0.1	0.1
20080512	Xiaoyudong fault (XF)	270	16/06	Liu-Zeng et al., 2009		616015	103.779	31.1775	921																	0.85	0.15	0.15
20080512	Xiaoyudong fault (XF)	271	16/06	Liu-Zeng et al., 2009		616014	103.779	31.1775	920																	0.61	0.1	0.1
20080512	Xiaoyudong fault (XF)	272	16/06	Liu-Zeng et al., 2009		616013	103.781	31.1771	920																	0.41	0.1	0.1
20080512	Xiaoyudong fault (XF)	273	16/06	Liu-Zeng et al., 2009		616012	103.781	31.177	920																	0.5	0.1	0.1
20080512	Xiaoyudong fault (XF)	274	16/06	Liu-Zeng et al., 2009		615005, 616010	103.784	31.1761	928																	0.3	0.15	0.15	0.44	0.21																		300
20080512	Xiaoyudong fault (XF)	279	15/06	Liu-Zeng et al., 2009		615001-615004	103.789	31.1738	905																	0.51	0.1	0.1	0.57	0.42
20080512	Xiaoyudong fault (XF)	282	15/06	Liu-Zeng et al., 2009		615006-615010	103.79	31.1734	905																	0.53	0.1	0.1	0.55	0.51
20080512	Xiaoyudong fault (XF)	285	15/06	Liu-Zeng et al., 2009		615011	103.79	31.1723	905																	0.5	0.1	0.1
20080512	Xiaoyudong fault (XF)	286	15/06	Liu-Zeng et al., 2009		615013	103.79	31.1719	905																	0.43	0.1	0.1
20080512	Xiaoyudong fault (XF)	287	15/06	Liu-Zeng et al., 2009		615033	103.791	31.1683	904																	0.26	0.05	0.05
20080512	Xiaoyudong fault (XF)	288	15/06	Liu-Zeng et al., 2009		615032	103.791	31.168	904																	0.22	0.05	0.05
20080512	Xiaoyudong fault (XF)	289	15/06	Liu-Zeng et al., 2009		615029	103.792	31.1671	905																	0.53	0.08	0.08
20080512	Xiaoyudong fault (XF)	290	15/06	Liu-Zeng et al., 2009		615028	103.792	31.1668	903																	0.52	0.08	0.08
20080512	Xiaoyudong fault (XF)	291	15/06	Liu-Zeng et al., 2009		615027	103.792	31.1665	903																	0.46	0.07	0.07
20080512	Xiaoyudong fault (XF)	292	15/06	Liu-Zeng et al., 2009		615026	103.792	31.1664	902																	0.47	0.07	0.07
20080512	Xiaoyudong fault (XF)	293	15/06	Liu-Zeng et al., 2009		615025	103.792	31.1663	902																	0.45	0.07	0.07
20080512	Xiaoyudong fault (XF)	294	15/06	Liu-Zeng et al., 2009		615024	103.792	31.1661	898																	0.33	0.05	0.05
20080512	Xiaoyudong fault (XF)	295	15/06	Liu-Zeng et al., 2009		615023	103.792	31.166	901																	0.33	0.05	0.05
20080512	Xiaoyudong fault (XF)	296	15/06	Liu-Zeng et al., 2009		615022	103.792	31.1659	901																	0.46	0.07	0.07
20080512	Xiaoyudong fault (XF)	297	15/06	Liu-Zeng et al., 2009		615021	103.792	31.1657	903																	0.48	0.07	0.07
20080512	Xiaoyudong fault (XF)	298	15/06	Liu-Zeng et al., 2009		615020	103.792	31.1656	904																	0.32	0.05	0.05
20080512	Xiaoyudong fault (XF)	299	15/06	Liu-Zeng et al., 2009		615019	103.792	31.1656	903																	0.39	0.06	0.06
20080512	Xiaoyudong fault (XF)	300	15/06	Liu-Zeng et al., 2009		615018	103.792	31.1655	904																	0.38	0.06	0.06
20080512	Xiaoyudong fault (XF)	301	15/06	Liu-Zeng et al., 2009		615017	103.792	31.1654	902																	0.36	0.05	0.05
20080512	Xiaoyudong fault (XF)	302	15/06	Liu-Zeng et al., 2009; Xu et al., 2009		615014; 24, 26-27	103.793	31.1639	897	0.34	LL	0.1	0.1	0.38	0.3											0.27	0.1	0.1	0.3	0.2
20080512	Beichuan-Yingxiu rupture zone	303		Xu et al., 2009		1-2, 125	103.483	31.0614																		1
20080512	Beichuan-Yingxiu rupture zone	312		Xu et al., 2009		9-10, 120; 243-b	103.615	31.0892	1004																	4.7	0.5	0.7	5.2	4								NW
20080512	Beichuan-Yingxiu rupture zone	313		Xu et al., 2009; Zhang et al., 2012		11-12, 115; 2-3, 11	103.616	31.0899		3.9	RL	1	1.1	4.9	2.8			36								3.6	1.2	1.7	4.8	1.9								NW
20080512	Beichuan-Yingxiu rupture zone	318		Xu et al., 2009		16	103.662	31.1231		4	RL															3												SE
20080512	Beichuan-Yingxiu rupture zone	319		Xu et al., 2009		17	103.664	31.1253		1.2	RL															0.5												SE
20080512	Beichuan-Yingxiu rupture zone	328		Xu et al., 2009		26	103.995	31.4535																		3.4
20080512	Beichuan-Yingxiu rupture zone	329		Xu et al., 2009		27	104.071	31.534																		3
20080512	Beichuan-Yingxiu rupture zone	330		Xu et al., 2009		28	104.129	31.585																		3.5
20080512	Beichuan-Yingxiu rupture zone	332		Xu et al., 2009		30	104.131	31.5868																		3.2
20080512	Beichuan-Yingxiu rupture zone	333		Xu et al., 2009		31	104.131	31.5874																		3.25
20080512	Beichuan-Yingxiu rupture zone	338		Xu et al., 2009		36	104.154	31.6189																		3.2
20080512	Beichuan-Yingxiu rupture zone	339		Xu et al., 2009		37	104.155	31.6189																		2.05
20080512	Beichuan-Yingxiu rupture zone	340		Xu et al., 2009; Zhang et al., 2012		38; 29	104.173	31.6286										46.5								2.9	0.3	0.3	3.15	2.6
20080512	Beichuan-Yingxiu rupture zone	341		Xu et al., 2009		39	104.174	31.6293																		2.59
20080512	Beichuan-Yingxiu rupture zone	342		Xu et al., 2009		40	104.174	31.6293		1.6	RL															3.19
20080512	Beichuan-Yingxiu rupture zone	346		Xu et al., 2009		44	104.206	31.631																		0.16
20080512	Beichuan-Yingxiu rupture zone	347		Xu et al., 2009		45	104.281	31.6471		4.3	RL															5.2
20080512	Beichuan-Yingxiu rupture zone	348		Xu et al., 2009; Yu et al., 2010		46-48, 127-128; 69, 72	104.382	31.7248		1.2	RL															1.5	0.1	0.1	1.6	1.5
20080512	Beichuan-Yingxiu rupture zone	351		Xu et al., 2009		49	104.408	31.7446																		1.8
20080512	Beichuan-Yingxiu rupture zone	353		Xu et al., 2009; Yu et al., 2010		51, 81-84, 109	104.423	31.7793		1.3	RL	0.7	0.5	2	0.8											3	0.9	1	3.85	2.09
20080512	Beichuan-Yingxiu rupture zone	358		Xu et al., 2009; Yu et al., 2010		54, 56, 59; 100	104.42	31.7813																		1
20080512	Beichuan-Yingxiu rupture zone	372		Xu et al., 2009		70	104.42	31.7816																		1
20080512	Beichuan-Yingxiu rupture zone	380		Xu et al., 2009		78-80	104.422	31.7793		0.2	RL															0.77	0.3	0.4	0.95	0.4
20080512	Beichuan-Yingxiu rupture zone	387		Xu et al., 2009		85	104.426	31.769		1.4	RL															1.5
20080512	Beichuan-Yingxiu rupture zone	388		Xu et al., 2009		86	104.426	31.7754																		5.2
20080512	Beichuan-Yingxiu rupture zone	389		Xu et al., 2009, Yu et al., 2009		88-89	104.427	31.7988		2.3	RL	0.3	0.3	2.46	2.1											2.52	0.1	0.1	2.54	2.5
20080512	Beichuan-Yingxiu rupture zone	393		Xu et al., 2009		92	104.429	31.8014		1.43	RL															1.6
20080512	Beichuan-Yingxiu rupture zone	396		Xu et al., 2009		95	104.446	31.8151																		2.5
20080512	Beichuan-Yingxiu rupture zone	397		Xu et al., 2009		96	104.447	31.8155																		1.25
20080512	Beichuan-Yingxiu rupture zone	398		Xu et al., 2009		97	104.448	31.8152																		0.25
20080512	Beichuan-Yingxiu rupture zone	399		Xu et al., 2009		98-100	104.448	31.8156																		3.6	0.7	1.5	4.3	2.12
20080512	Beichuan-Yingxiu rupture zone	403		Xu et al., 2009		102	104.464	31.8349																		4
20080512	Beichuan-Yingxiu rupture zone	405		Xu et al., 2009; Yu et al., 2010; Zhang et al., 2012		104; 147; 38	104.47	31.8397		2.35	RL	0.35	0.35	2.7	2			60								5.2	0.5	0.3	5.7	4.9
20080512	Beichuan-Yingxiu rupture zone	406		Xu et al., 2009		105	104.498	31.8563																		3.2
20080512	Beichuan-Yingxiu rupture zone	407		Xu et al., 2009		106-110	104.499	31.8569		4.21	RL	0.15	0.45	4.35	3.88											2.8	0.2	0.4	3	2.4
20080512	Beichuan-Yingxiu rupture zone	417		Xu et al., 2009		116-118	103.617	31.0912																		0.75	0.25	0.3	1	0.45
20080512	Beichuan-Yingxiu rupture zone	420		Xu et al., 2009		119	103.622	31.1004																		3.3												NW
20080512	Beichuan-Yingxiu rupture zone	427		Xu et al., 2009		126	103.656	31.1197		4.3	RL															1.2												NW
20080512	Beichuan-Yingxiu rupture zone	430		Xu et al., 2009		90, 129-131	104.426	31.7697		0.4	RL															0.57	0.2	0.1	0.7	0.5
20080512	Beichuan-Yingxiu rupture zone	434		Xu et al., 2009		133	104.428	31.8																		4.5
20080512	Beichuan-Yingxiu rupture zone	441		Xu et al., 2009		141	104.62	31.9936		1.4	RL															1.9
20080512	Beichuan-Yingxiu rupture zone	442		Xu et al., 2009		142	104.62	31.9944																		2
20080512	Beichuan-Yingxiu rupture zone	447		Xu et al., 2009		148	104.646	32.016		2.5	RL															2.5
20080512	Beichuan-Yingxiu rupture zone	448		Xu et al., 2009, Yu et al., 2009		150	104.648	32.0225		2.5	RL															2.5
20080512	Beichuan-Yingxiu rupture zone	449		Xu et al., 2009		152, 154	104.677	32.054		4.8	RL	0.2	0.2	4.9	4.65											1.5
20080512	Beichuan-Yingxiu rupture zone	450		Xu et al., 2009; Yu et al., 2009		153, 155, 158; 205	104.678	32.0545		4.6	RL	0.8	0.6	5.4	4											3.1	0.6	0.7	3.7	2.4
20080512	Beichuan-Yingxiu rupture zone	453		Xu et al., 2009; Yu et al., 2010; Zhang et al., 2012		156, 157, 159; 206; 46	104.678	32.055		4.2	RL	0.5	0.5	4.7	3.8			40								3.8	0.2	0.2	4	3.6
20080512	Beichuan-Yingxiu rupture zone	457		Xu et al., 2009; Wang et al., 2010		160	104.679	32.0558		3.7	RL								1.3	S						4
20080512	Beichuan-Yingxiu rupture zone	458		Xu et al., 2009		161	104.679	32.0559																		3.7
20080512	Beichuan-Yingxiu rupture zone	463		Xu et al., 2009; Yu et al., 2010		166-168; 219	104.689	32.0636		2	RL			2.2	1.85											2.15	0.5	0.2	2.5	2
20080512	Beichuan-Yingxiu rupture zone	467		Xu et al., 2009		170-171	104.843	32.2061		1.6	RL															1.2
20080512	Beichuan-Yingxiu rupture zone	472		Xu et al., 2009		175	104.849	32.2101		1.3	RL															0.85
20080512	Beichuan-Yingxiu rupture zone	477		Liu-Zeng et al., 2009; Xu et al., 2009; Zhang et al., 2012		1059; 179-180; 38-39	104.88	32.2386	766	3.05	RL							7.6								2.3	0.2	0.2	2.5	2.1
20080512	Beichuan-Yingxiu rupture zone	478		Xu et al., 2009		181 - 186	104.945	32.2857		2.4	RL			3.5	1.4											1.1			1.7	0.75
20080512	Beichuan-Yingxiu rupture zone	484		Xu et al., 2009		187, 188	104.973	32.3116		3.1	RL			3.4	2.8											0.26	0.26	0.26	0.52	0
20080512	Beichuan-Yingxiu rupture zone	486		Xu et al., 2009		189	105.032	32.3461																		0.53
20080512	Hanwang rupture zone	488		Xu et al., 2009		2	103.854	31.1665																		0.6
20080512	Hanwang rupture zone	489		Xu et al., 2009		3	103.855	31.1669																		0.52
20080512	Hanwang rupture zone	490		Xu et al., 2009		4	103.86	31.17																		0.7
20080512	Hanwang rupture zone	492		Xu et al., 2009		6	103.865	31.174																		1.8
20080512	Hanwang rupture zone	493		Xu et al., 2009		7	103.898	31.2016																		2.2
20080512	Hanwang rupture zone	494		Xu et al., 2009		8	103.899	31.2026		0.8	RL															1.9
20080512	Hanwang rupture zone	506		Xu et al., 2009		20	103.935	31.2276		0.5	RL															1.05
20080512	Hanwang rupture zone	507		Xu et al., 2009		21-23	103.988	31.2927																		0.55	0.1	0.1	0.6	0.5
20080512	Hanwang rupture zone	512		Xu et al., 2009		26	104.082	31.369																		1.5
20080512	Hanwang rupture zone	519		Xu et al., 2009		33	104.153	31.4371		0.25	RL
20080512	Hanwang rupture zone	520		Xu et al., 2009		34	104.159	31.4608																		0.8
20080512	Hanwang rupture zone	528		Xu et al., 2009		42	104.232	31.5123																		0.46
20080512	Hanwang rupture zone	529		Xu et al., 2009		43	104.33	31.6049																		0.2
20080512	Hanwang rupture zone	530		Xu et al., 2009		44	104.35	31.6131																		0.25
20080512	Hanwang rupture zone	531		Xu et al., 2009		45-46	104.372	31.6284																		0.18
20080512	Xiaoyudong rupture zone	533		Xu et al., 2009; Zhang et al., 2012		1; 1, 45	103.718	31.1085										12.7								0.4	0.1	0.1	0.5	0.3
20080512	Xiaoyudong rupture zone	538		Xu et al., 2009; Zhang et al., 2012		6,7; 18	103.753	31.1958		2.7		0.3	0.3	2.96	2.4			35								2.05	0.15	0.15	2.2	1.9
20080512	Xiaoyudong rupture zone	542		Xu et al., 2009; Zhang et al., 2012		10-13; 8, 17	103.754	31.1942		1.7	LL	0.6	0.7	2.3	1			40								1.4	0.2	0.2	1.6	1.2
20080512	Xiaoyudong rupture zone	548		Xu et al., 2009		16-17, 19	103.758	31.1257		0.23	RL	0.25	0.15	0.45	0.1											0.13	0.1	0.1	0.2	0.06
20080512	Xiaoyudong rupture zone	554		Xu et al., 2009; Liu-Zeng et al., 2012		22; 167-a, 167-b	103.792	31.1607																		0.4					0.57
20080512	Beichuan-Yingxiu rupture zone	560		Yu et al., 2010; Zhang et al., 2012		7-9; 4	103.486	31.065		0.6	RL							32								1	0.2	0.2	1.2	0.8
20080512	Beichuan-Yingxiu rupture zone	567		Yu et al., 2010		75, 77	104.42	31.781																		1
20080512	Beichuan-Yingxiu rupture zone	572		Yu et al., 2010		140-143	104.462	31.8331		3.1	RL	0.6	0.6	3.7	2.5											1.6	1.25	1	2.85	0.65
20080512	Beichuan-Yingxiu rupture zone	577		Yu et al., 2010		149	104.471	31.8406																		3
20080512	Beichuan-Yingxiu rupture zone	578		Yu et al., 2010		150	104.472	31.841																		4
20080512	Beichuan-Yingxiu rupture zone	580		Yu et al., 2010		152	104.472	31.8414																		0.7
20080512	Beichuan-Yingxiu rupture zone	581		Yu et al., 2010		153	104.472	31.8416																		4
20080512	Beichuan-Yingxiu rupture zone	582		Yu et al., 2010		154	104.473	31.842		4	RL															6
20080512	Beichuan-Yingxiu rupture zone	583		Yu et al., 2010		155	104.474	31.8429		3.3	RL															6
20080512	Beichuan-Yingxiu rupture zone	584		Yu et al., 2010		156	104.474	31.843																		4
20080512	Beichuan-Yingxiu rupture zone	587		Yu et al., 2010		159	104.476	31.8444		2.3	RL
20080512	Beichuan-Yingxiu rupture zone	588		Yu et al., 2010		160	104.476	31.8449																		0.9
20080512	Beichuan-Yingxiu rupture zone	589		Yu et al., 2010		161	104.478	31.8459																		1.5
20080512	Beichuan-Yingxiu rupture zone	590		Yu et al., 2010		162	104.478	31.8463																		1.5
20080512	Beichuan-Yingxiu rupture zone	594		Yu et al., 2010		183	104.62	31.9939																		1.7
20080512	Beichuan-Yingxiu rupture zone	602		Yu et al., 2010; Zhang et al., 2012		224-225; 43-44	104.838	32.2014		2.4	RL							12								1.58	0.15	0.1	1.7	1.5
20080512	Beichuan-Yingxiu rupture zone	607		Yu et al., 2010		241	104.887	32.2454																		1.7
20080512	Xiaoyudong rupture zone	608		Liu-Zeng et al., 2012; Zhang et al., 2012		1021; 21	103.739	31.2145	1151									60								2.6	0.4	0.4	3	2.2								SW
20080512	Xiaoyudong rupture zone	610		Liu-Zeng et al., 2012		998	103.756	31.1933	997																	0.7
20080512	Xiaoyudong rupture zone	611		Liu-Zeng et al., 2012		1001	103.756	31.193	994																	0.25	0.05	0.05
20080512	Xiaoyudong rupture zone	612		Liu-Zeng et al., 2012		1006	103.756	31.1929	998	0.85	LL															0.65																						344
20080512	Xiaoyudong rupture zone	615		Liu-Zeng et al., 2012		616011	103.781	31.1769	904																	0.5	0.1	0.1
20080512	Beichuan-Yingxiu fault	624		Wang et al., 2010			103.912	31.2111											2.25	S	0.25	0.25	0.25	2		1.7
20080512		632		Zhang et al., 2012		1	103.407	30.929										5								0.4												NW
20080512		633		Zhang et al., 2012		2	103.403	30.988										15								1.8
20080512		634		Zhang et al., 2012		3	103.54	31.055										10								0.4												NW
20080512		656		Zhang et al., 2012		25	103.999	31.461										35								1.5
20080512		657		Zhang et al., 2012		26	104.092	31.522										18								0.6
20080512		659		Zhang et al., 2012		28	104.128	31.584										10								0.3
20080512		661		Zhang et al., 2012		30	104.226	31.629										20								2.5
20080512		662		Zhang et al., 2012		31	104.264	31.642										25								0.6
20080512		666		Zhang et al., 2012		35	104.448	31.817										130								7.5
20080512		668		Zhang et al., 2012		37	104.469	31.839										60								2.3
20080512		673		Zhang et al., 2012		42	104.557	31.898										15								1.4
20080512		674		Zhang et al., 2012		43	104.564	31.907										60								2.4
20080512		676		Zhang et al., 2012		45	104.677	32.053										25								3
20080512		679		Zhang et al., 2012		48	104.735	32.102										35								2
20080512		680		Zhang et al., 2012		49	104.8	32.172										40								1.5
20080512		682		Zhang et al., 2012		51	104.838	32.204										30								1.2
20080512	Beichuan-Yingxiu rupture zone	684		Xu et al., 2009; Zhang et al., 2012		177-178; 52-53	104.876	32.235		2.1	RL							30								1.7	0.2	0.2	1.9	1.5
20080512		685		Zhang et al., 2012; Zhang et al., 2010		54; B153	104.941	32.277										35								1.7	0.1	0.1	1.8	1.6
20080512		696		Zhang et al., 2012		11-14	103.79	31.17										2.5								0.4	0.2	0.1	0.6	0.3
20080512		701		Zhang et al., 2012		15-18	103.91	31.21										16.8								2.4	0.5	0.6	2.9	1.8
20080512		704		Zhang et al., 2012		19-20	103.95	31.25										10.5								1.25	0.15	0.15	1.4	1.1
20080512		717		Zhang et al., 2012		32-33	104.62	32										17								1.75	0.1	0.1	1.8	1.7
20080512		719		Zhang et al., 2012		34	104.52	31.87										10.5								1.5
20080512		720		Zhang et al., 2012		35-37	104.69	32.06										15.5								1.7	0.3	0.3	2	1.4
20080512		725		Zhang et al., 2012		40-41	104.84	32.21										18								0.5
20080512		731		Zhang et al., 2012		46	103.96	31.26										8								2.1
20080512		734		Zhang et al., 2012		49	104.45	31.82										15								1.8
20080512		735		Zhang et al., 2012		50	104.68	32.06										15								2.2
20080512		736		Chen et al., 2008			104.42	31.7811	757																	0.36
20080512		737		Chen et al., 2008			104.42	31.7812	756																	0.81
20080512		739		Zhou et al., 2010		S1	104.842	32.2049		1.4								4.5								1.2																						55
20080512		740		Zhou et al., 2010		S2	104.722	32.0911										27								2.7																						55
20080512		741		Zhou et al., 2010		S3	104.681	32.0571		3.7								36								3.66																						60
20080512		742		Zhou et al., 2010		S4	104.544	31.8847		2.1								30								2.3	0.1	0.1	2.4	2.2																		27	5
20080512		743		Zhou et al., 2010		S5	104.481	31.8477										25								3.5	0.5	0.5	4	3																		55	5
20080512		744		Zhou et al., 2010		S6	104.454	31.8251		2.6								27								3
20080512		745		Zhou et al., 2010		S7	104.427	31.7977										41								3.24
20080512		746		Zhou et al., 2010		S8	104.417	31.7495		1.88								39								3.69
20080512		748		Zhou et al., 2010; Zhang et al., 2010		S10; B108	104.16	31.622										30								3.1	0.1	0.1	3.19	3																		65
20080512		752		Zhou et al., 2010		S14	104.212	31.4847										6								0.94
20080512		755		Zhou et al., 2010		S17	103.896	31.1998										25.8								3.65																						50
20080512		756		Zhou et al., 2010		S18	103.886	31.1892										19.8								2.2																						55
20080512		757		Zhou et al., 2010		S19	103.872	31.1774										12.9								2.8																						70
20080512		758		Zhou et al., 2010		S20	103.752	31.1962		2.3								30								1.1																						320
20080512		762		Zhang et al., 2010		B066	103.785	31.257		0.3																0.5
20080512		768		Liu-Zeng et al., 2012		994	103.756	31.1934		1.45																1.1
20080512		769		Liu-Zeng et al., 2010		617023	103.663	31.1214																		5												NW
20141122		1		Katsube et al., 2017		NGH23	137.882	36.7131											0.1	S																			0.1
20141122		2		Katsube et al., 2017		NGH22	137.883	36.7125											0.04	S																			0.04
20141122		3		Katsube et al., 2017		NGH27	137.881	36.7125											0.26	S						0.3													0.4									95
20141122		4		Katsube et al., 2017		NGH21	137.883	36.7115																		0.2													0.2									280
20141122		5		Katsube et al., 2017		NGH20	137.882	36.7114																		0.4													0.4									85
20141122		6		Katsube et al., 2017		NGH24	137.881	36.7111											0.2	S																			0.2
20141122		7		Katsube et al., 2017		NGH14	137.877	36.7082																		0.9													0.9									31
20141122		8		Katsube et al., 2017		NGH53	137.883	36.708																		0.2													0.2									51
20141122		9		Katsube et al., 2017		NGH52	137.883	36.7078																		0.3													0.3
20141122		10		Katsube et al., 2017		NGH47	137.877	36.7073																		0.8													0.8
20141122		11		Katsube et al., 2017		NGH51	137.882	36.7073																		0.4													0.4									26
20141122		12		Katsube et al., 2017		NGH50	137.882	36.7069																		0.5													0.5									21
20141122		13		Katsube et al., 2017; Ishimura et al., 2019		NGH46; Line C	137.876	36.7066																		0.78			0.9	0.6									0.78
20141122		14		Katsube et al., 2017		NGH49	137.882	36.7065																		0.6													0.6									30
20141122		15		Katsube et al., 2017		NGH48	137.881	36.7056																		0.3													0.3									40
20141122		16		Katsube et al., 2017		NGH54	137.88	36.7029																		0.4													0.4									20
20141122		17		Katsube et al., 2017; Ishimura et al., 2019		NGH44, Line D	137.872	36.7008																		0.5			0.8	0.4									0.5									25
20141122		18		Katsube et al., 2017		NGH13	137.87	36.6972																		0.4													0.4
20141122		19		Katsube et al., 2017		NGH42	137.867	36.6952											0.3	S																			0.3									75
20141122		20		Katsube et al., 2017		NGH40	137.865	36.6949																		0.2													0.2									40
20141122		21		Katsube et al., 2017		NGH41	137.865	36.6944																		0.2													0.2									35
20141122		22		Katsube et al., 2017		NGH39	137.864	36.6929											0.15	S						0.15													0.21									30
20141122		23		Katsube et al., 2017		NGH38	137.862	36.6913											0.04	S						0.15													0.16									30
20141122		24		Katsube et al., 2017		NGH32	137.86	36.6876											0.08	S																			0.08									20
20141122		25		Katsube et al., 2017		NGH31	137.86	36.6872											0.05	S																			0.05									170
20141122		26		Katsube et al., 2017; Ishimura et al., 2019		NGH16-2; Line G	137.852	36.6707																		0.4			0.5	0.3									0.4									20
20141122		27		Katsube et al., 2017		NGH16	137.852	36.6692																		0.5													0.5									20
20141122		28		Katsube et al., 2017		NGH15	137.852	36.6669																		0.7													0.7									315
20141122		29		Katsube et al., 2017		NGH15-2	137.851	36.6667																		0.5													0.5									20
20141122		30		Katsube et al., 2017		NGH12	137.852	36.6633											0.6	S																			0.6
20141122		31		Katsube et al., 2017, Ishimura et al., 2019		NGH11; Line I	137.853	36.6619		0.2																0.3			0.4	0.2																		272
20141122		32		Katsube et al., 2017		NGH37	137.854	36.6596											0.02	S																			0.02
20141122		33		Katsube et al., 2017		NGH09	137.857	36.6578											0.01	S																			0.01
20141122		34		Katsube et al., 2017		NGH35	137.855	36.6577											0.05	S																			0.05
20141122		35		Katsube et al., 2017		NGH33	137.856	36.6558											0.04	S																			0.04									14
20141122		36		Katsube et al., 2017		NGH34	137.856	36.6557											0.12	S																			0.12									14
20141122		37		Katsube et al., 2017		NGH08	137.857	36.6538											0.28	S																			0.28
20141122		38		Katsube et al., 2017		NGH07	137.858	36.6519											0.05	S																			0.05
20141122		39		Katsube et al., 2017		NGH06	137.857	36.6512											0.21	S																			0.21									5
20141122		40		Katsube et al., 2017		NGH05	137.859	36.6511											0.02	S						0.02													0.03									61
20141122		41		Katsube et al., 2017		NGH04	137.858	36.6499											0.04	S																			0.04
20141122		42		Katsube et al., 2017		NGH19-2	137.861	36.6465		0.15																0.1													0.18									65
20141122		43		Katsube et al., 2017		NGH19	137.861	36.6461		0.04																0.03													0.05									65
20141122		44		Ishimura et al., 2019		Line A	137.878	36.7086																		0.85			0.9	0.8
20141122		45		Ishimura et al., 2019		Line B	137.89	36.7087																		0.45			0.5	0.4
20141122		48		Ishimura et al., 2019		Line E	137.872	36.6998																		1
20141122		49		Ishimura et al., 2019		Line F	137.861	36.6886																		0.1
20141122		51		Ishimura et al., 2019		Line H	137.852	36.6641																		0.9			1	0.8
20120323		1		Clark et al., 2014, King et al., 2019			132.12	-26.1212																		0.07													0.14
20120323		2		Clark et al., 2014, King et al., 2019			132.121	-26.1212																		0.04													0.08
20120323		3		Clark et al., 2014, King et al., 2019			132.122	-26.1209																		0.15													0.3
20120323		4		Clark et al., 2014, King et al., 2019			132.122	-26.1209																		0.05													0.1
20120323		5		Clark et al., 2014, King et al., 2019			132.123	-26.1208																		0.02													0.04
20120323		6		Clark et al., 2014, King et al., 2019			132.124	-26.1208																		0.05													0.1
20120323		7		Clark et al., 2014, King et al., 2019			132.125	-26.121																		0.08													0.16
20120323		8		Clark et al., 2014, King et al., 2019			132.125	-26.121																		0.04													0.08
20120323		9		Clark et al., 2014, King et al., 2019			132.125	-26.1211																		0.1													0.2
20120323		10		Clark et al., 2014, King et al., 2019			132.126	-26.1212																		0.06													0.12
20120323		11		Clark et al., 2014, King et al., 2019			132.126	-26.1213																		0.05													0.1
20120323		12		Clark et al., 2014, King et al., 2019			132.126	-26.1214																		0.14													0.28
20120323		13		Clark et al., 2014, King et al., 2019			132.127	-26.122																		0.15													0.3
20120323		14		Clark et al., 2014, King et al., 2019			132.127	-26.1226																		0.08													0.16
20120323		15		Clark et al., 2014, King et al., 2019			132.128	-26.1233																		0.09													0.18
20120323		16		Clark et al., 2014, King et al., 2019			132.127	-26.1242																		0.36													0.86
20120323		17		Clark et al., 2014, King et al., 2019			132.127	-26.1243																		0.21													0.42
20120323		18		Clark et al., 2014, King et al., 2019			132.127	-26.1245																		0.48													0.96
20120323		19		Clark et al., 2014, King et al., 2019			132.127	-26.1246																		0.46													0.92
20120323		20		Clark et al., 2014, King et al., 2019			132.127	-26.1248																		0.29													0.58
20120323		21		Clark et al., 2014, King et al., 2019			132.128	-26.125																		0.4													0.8
20120323		22		Clark et al., 2014, King et al., 2019			132.128	-26.1252																		0.22													0.44
20120323		23		Clark et al., 2014, King et al., 2019			132.128	-26.1259																		0.05													0.1
20120323		24		Clark et al., 2014, King et al., 2019			132.129	-26.1263																		0.02													0.04
19700310		1		King et al., 2019			116.472	-31.1262																		0.127													0.38
19700310		2		King et al., 2019			116.472	-31.1258																		0.178													0.53
19700310		3		King et al., 2019			116.473	-31.1237																		0.127													0.38
19700310		4		King et al., 2019			116.473	-31.1225																		0.152													0.45
19700310		5		King et al., 2019			116.473	-31.1223																		0.152													0.45
19700310		6		King et al., 2019			116.473	-31.1221																		0.152													0.45
19700310		7		King et al., 2019			116.473	-31.1216																		0.203													0.6
19700310		8		King et al., 2019			116.473	-31.1207																		0.203													0.63
19700310		9		King et al., 2019			116.473	-31.1199																		0.152													0.45
19700310		10		King et al., 2019			116.473	-31.1194																		0.127													0.38
19700310		11		King et al., 2019			116.473	-31.1192																		0.279													0.82
19700310		12		King et al., 2019			116.472	-31.1186																		0.178													0.53
19700310		13		King et al., 2019			116.472	-31.1185																		0.064													0.31
19700310		14		King et al., 2019			116.472	-31.1181																		0.089													0.27
19700310		15		King et al., 2019			116.472	-31.1176																		0.229													0.67
19700310		16		King et al., 2019			116.472	-31.1172																		0.152													0.6
19700310		17		King et al., 2019			116.472	-31.1162																		0.229													0.68
19700310		18		King et al., 2019			116.472	-31.1154																		0.051													0.15
19700310		19		King et al., 2019			116.472	-31.1148																		0.279													1.26
19700310		20		King et al., 2019			116.472	-31.1146																		0.381													1.13
19700310		21		King et al., 2019			116.473	-31.1142																		0.33													0.99
19700310		22		King et al., 2019			116.473	-31.1136																		0.279													0.79
19700310		23		King et al., 2019			116.474	-31.1135																		0.102													0.3
19700310		24		King et al., 2019			116.474	-31.1133																		0.076													0.23
19700310		25		King et al., 2019			116.474	-31.1136																		0.178													0.43
19700310		26		King et al., 2019			116.477	-31.1088																		0.076													0.18
19700310		27		King et al., 2019			116.478	-31.1068																		0.051													0.19
19700310		28		King et al., 2019			116.477	-31.1042																		0.076													0.15
19700310		29		King et al., 2019			116.478	-31.0998		0.038	LL																												0.04
19700310		30		King et al., 2019			116.472	-31.1167		0.076	LL
19700310		31		King et al., 2019			116.472	-31.1164		0.089	LL
19700310		32		King et al., 2019			116.472	-31.1148		0.127	LL
19700310		33		King et al., 2019			116.472	-31.1146		0.89	LL
19700310		34		King et al., 2019			116.473	-31.1141		0.14	LL
19700310		35		King et al., 2019			116.473	-31.1131		0.076	RL
20160520		12		King et al., (in preparation)			129.812	-25.6096																		0.033													0.07
20160520		13		King et al., (in preparation)			129.812	-25.6095																		0.045													0.09
20160520		14		King et al., (in preparation)			129.778	-25.6025																		0.05													0.1
20160520		15		King et al., (in preparation)			129.838	-25.6256																		0.055													0.11
20160520		16		King et al., (in preparation)			129.819	-25.6128																		0.056													0.12
20160520		17		King et al., (in preparation)			129.87	-25.644																		0.056													0.1
20160520		18		King et al., (in preparation)			129.902	-25.6619																		0.059													0.12
20160520		19		King et al., (in preparation)			129.916	-25.6712																		0.069													0.14
20160520		20		King et al., (in preparation)			129.872	-25.6494																		0.072													0.13
20160520		21		King et al., (in preparation)			129.917	-25.6718																		0.074													0.15
20160520		22		King et al., (in preparation)			129.858	-25.6377																		0.076													0.18
20160520		23		King et al., (in preparation)			129.81	-25.6193																		0.077													0.16
20160520		24		King et al., (in preparation)			129.85	-25.6357																		0.08													0.19
20160520		25		King et al., (in preparation)			129.847	-25.6343																		0.082													0.2
20160520		26		King et al., (in preparation)			129.802	-25.6105																		0.083													0.17
20160520		27		King et al., (in preparation)			129.819	-25.6127																		0.085													0.17
20160520		28		King et al., (in preparation)			129.819	-25.6128																		0.09													0.18
20160520		29		King et al., (in preparation)			129.918	-25.6724																		0.091													0.19
20160520		30		King et al., (in preparation)			129.847	-25.6338																		0.092													0.22
20160520		31		King et al., (in preparation)			129.818	-25.6125																		0.094													0.19
20160520		32		King et al., (in preparation)			129.846	-25.6333																		0.095													0.23
20160520		33		King et al., (in preparation)			129.859	-25.6388																		0.095													0.23
20160520		34		King et al., (in preparation)			129.781	-25.6038																		0.1													0.2
20160520		35		King et al., (in preparation)			129.807	-25.6135																		0.1													0.24
20160520		36		King et al., (in preparation)			129.813	-25.6097																		0.1													0.2
20160520		37		King et al., (in preparation)			129.838	-25.6254																		0.1													0.2
20160520		38		King et al., (in preparation)			129.854	-25.6369																		0.103													0.25
20160520		39		King et al., (in preparation)			129.853	-25.6368																		0.112													0.27
20160520		40		King et al., (in preparation)			129.857	-25.6375																		0.117													0.28
20160520		41		King et al., (in preparation)			129.807	-25.6146																		0.121													0.25
20160520		42		King et al., (in preparation)			129.836	-25.6244																		0.121													0.25
20160520		43		King et al., (in preparation)			129.851	-25.6366																		0.122													0.29
20160520		44		King et al., (in preparation)			129.808	-25.6159																		0.124													0.25
20160520		45		King et al., (in preparation)			129.845	-25.6326																		0.127													0.31
20160520		46		King et al., (in preparation)			129.807	-25.615																		0.131													0.27
20160520		47		King et al., (in preparation)			129.862	-25.6409																		0.134													0.32
20160520		48		King et al., (in preparation)			129.903	-25.662																		0.138													0.28
20160520		49		King et al., (in preparation)			129.803	-25.6115																		0.139													0.28
20160520		50		King et al., (in preparation)			129.872	-25.6478																		0.14													0.25
20160520		51		King et al., (in preparation)			129.905	-25.6636																		0.14													0.28
20160520		52		King et al., (in preparation)			129.857	-25.6375																		0.143													0.34
20160520		53		King et al., (in preparation)			129.808	-25.6172																		0.147													0.3
20160520		54		King et al., (in preparation)			129.874	-25.6495																		0.154													0.27
20160520		55		King et al., (in preparation)			129.879	-25.6515																		0.154													0.27
20160520		56		King et al., (in preparation)			129.837	-25.6248																		0.156													0.32
20160520		57		King et al., (in preparation)			129.803	-25.6107																		0.159													0.32
20160520		58		King et al., (in preparation)			129.872	-25.6461																		0.164													0.29
20160520		59		King et al., (in preparation)			129.905	-25.6634																		0.17													0.34
20160520		60		King et al., (in preparation)			129.871	-25.6448																		0.172													0.3
20160520		61		King et al., (in preparation)			129.799	-25.6105																		0.178													0.36
20160520		62		King et al., (in preparation)			129.821	-25.6139																		0.183													0.37
20160520		63		King et al., (in preparation)			129.842	-25.6261																		0.186													0.38
20160520		64		King et al., (in preparation)			129.841	-25.626																		0.192													0.39
20160520		65		King et al., (in preparation)			129.819	-25.6132																		0.196													0.4
20160520		66		King et al., (in preparation)			129.86	-25.6395																		0.196													0.47
20160520		67		King et al., (in preparation)			129.802	-25.6111																		0.199													0.4
20160520		68		King et al., (in preparation)			129.809	-25.6176																		0.2													0.4
20160520		69		King et al., (in preparation)			129.86	-25.6392																		0.201													0.48
20160520		70		King et al., (in preparation)			129.818	-25.6124																		0.207													0.42
20160520		71		King et al., (in preparation)			129.872	-25.6468																		0.209													0.37
20160520		72		King et al., (in preparation)			129.804	-25.6112																		0.216													0.44
20160520		73		King et al., (in preparation)			129.862	-25.642																		0.218													0.52
20160520		74		King et al., (in preparation)			129.857	-25.6374																		0.22													0.53
20160520		75		King et al., (in preparation)			129.905	-25.6637																		0.227													0.46
20160520		76		King et al., (in preparation)			129.809	-25.6185																		0.232													0.47
20160520		77		King et al., (in preparation)			129.802	-25.6112																		0.233													0.47
20160520		78		King et al., (in preparation)			129.84	-25.6255																		0.238													0.48
20160520		79		King et al., (in preparation)			129.874	-25.6496																		0.241													0.43
20160520		80		King et al., (in preparation)			129.872	-25.6464																		0.244													0.43
20160520		81		King et al., (in preparation)			129.874	-25.6495																		0.245													0.43
20160520		82		King et al., (in preparation)			129.781	-25.6034																		0.25													0.5
20160520		83		King et al., (in preparation)			129.792	-25.6086																		0.26													0.52
20160520		84		King et al., (in preparation)			129.88	-25.6519																		0.26													0.46
20160520		85		King et al., (in preparation)			129.801	-25.6111																		0.266													0.54
20160520		86		King et al., (in preparation)			129.871	-25.6449																		0.278													0.49
20160520		87		King et al., (in preparation)			129.807	-25.6126																		0.279													0.56
20160520		88		King et al., (in preparation)			129.79	-25.6073																		0.28													0.56
20160520		89		King et al., (in preparation)			129.872	-25.6455																		0.281													0.49
20160520		90		King et al., (in preparation)			129.801	-25.611																		0.288													0.58
20160520		91		King et al., (in preparation)			129.861	-25.64																		0.293													0.7
20160520		92		King et al., (in preparation)			129.841	-25.6259																		0.302													0.61
20160520		93		King et al., (in preparation)			129.82	-25.6132																		0.309													0.62
20160520		94		King et al., (in preparation)			129.87	-25.6436																		0.309													0.54
20160520		95		King et al., (in preparation)			129.888	-25.6559																		0.313													0.55
20160520		96		King et al., (in preparation)			129.857	-25.6373																		0.33													0.79									40
20160520		97		King et al., (in preparation)			129.815	-25.6105																		0.339													0.68
20160520		98		King et al., (in preparation)			129.874	-25.6493																		0.339													0.6
20160520		99		King et al., (in preparation)			129.79	-25.6078																		0.36													0.72
20160520		100		King et al., (in preparation)			129.862	-25.6411																		0.369													0.88
20160520		101		King et al., (in preparation)			129.871	-25.6452																		0.383													0.67
20160520		102		King et al., (in preparation)			129.858	-25.6378																		0.384													0.91
20160520		103		King et al., (in preparation)			129.881	-25.6525																		0.386													0.68
20160520		104		King et al., (in preparation)			129.791	-25.6081																		0.41													0.82
20160520		105		King et al., (in preparation)			129.857	-25.6374																		0.433													1.03
20160520		106		King et al., (in preparation)			129.882	-25.6528																		0.467													0.82
20160520		107		King et al., (in preparation)			129.79	-25.6074																		0.48													0.96
20160520		108		King et al., (in preparation)			129.82	-25.6139																		0.52													1.04
20160520		109		King et al., (in preparation)			129.884	-25.6539																		0.536													0.92									26
20160520		110		King et al., (in preparation)			129.814	-25.6101																		0.61													1.22
20160520		111		King et al., (in preparation)			129.886	-25.6547																		0.676													1.18
20160520		112		King et al., (in preparation)			129.886	-25.6551																		0.722													1.26
20160520		113		King et al., (in preparation)			129.816	-25.6113																		0.87													1.74
20160520		114		King et al., (in preparation)			129.817	-25.6119																		0.894													1.79
20160520		115		King et al., (in preparation)			129.815	-25.611																		0.96													1.92
20191111		1		Ritz et al. (submitted)		Profile 02	4.63865	44.508																								0.03		25				SE
20191111		2		Ritz et al. (submitted)		Profile 03; E_05	4.64231	44.5119																		0.11			0.13	0.09		0.13		130				SE
20191111		3		Ritz et al. (submitted)		Profile 04; E_09	4.64533	44.5145																	0.05							0.19		66				SE										80
20191111		4		Ritz et al. (submitted)		Profile 05	4.64996	44.5185																								0.23						SE
20191111		5		Ritz et al. (submitted)		Profile 06; E_04	4.65469	44.5223																		0.02						0.16		129				SE										45
20191111		6		Ritz et al. (submitted)		Profile 07; E_08	4.65622	44.523																								0.17		340				SE
20191111		7		Ritz et al. (submitted)		Profile 08	4.66033	44.5246																								0.16		218				SE
20191111		8		Ritz et al. (submitted)		Profile 09; E_02	4.66441	44.5277																		0.05						0.1		165				SE
20191111		9		Ritz et al. (submitted)		Profile 09	4.6681	44.525																								0.03		22				SE
20191111		10		Ritz et al. (submitted)		E_10	4.66536	44.5283																	0.05	0.01												SE
20191111		11		Ritz et al. (submitted)		E_11	4.6681	44.5284																	0.05
20191111		12		Ritz et al. (submitted)		Profile 10; E_01	4.66906	44.5307																		0.0275			0.04	0.015		0.02		45				SE
20191111		13		Ritz et al. (submitted)		Profile 10	4.67218	44.5284																								0.07		80				SE
20191111		14		Ritz et al. (submitted)		Profile 10	4.67348	44.5275																								0.05		84				SE
20191111		15		Ritz et al. (submitted)		Profile 11	4.67092	44.5323																								0.015		40				SE
20191111		16		Ritz et al. (submitted)		Profile 11	4.67363	44.5303																								0.04		53				SE
20191111		17		Ritz et al. (submitted)		Profile 11	4.67579	44.5288																								0.07		49				SE
20191111		18		Ritz et al. (submitted)		Profile 12	4.67566	44.535																								0.09		71				SE
20191111		19		Ritz et al. (submitted)		E_03	4.67622	44.5346																	0.05																							10
20191111		20		Ritz et al. (submitted)		Profile 12	4.6788	44.5327																								0.04		36				SE
20191111		21		Ritz et al. (submitted)		Profile 13; E_07	4.67804	44.5371																		0.025			0.02	0.03		0.06		140				SE
20191111		22		Ritz et al. (submitted)		Profile 13	4.68187	44.5344																								0.03		55				SE
[truncated: 19 more columns]
